# Supplementary material
Source: PubMed Central journal article supplement (PMC6124968)
Supplement: 661490.pdf [file 661490.pdf]

Promoting Healthy Eating and Physical Activity Behaviors: A Systematic Review of Multiple  
Health Behavior Change Interventions among Cancer Survivors

Steve Amireault, PhD, Angela J. Fong, MSc & Catherine M. Sabiston, PhD

Author Note

Steve Amireault, Purdue University, Department of Health and Kinesiology, West Lafayette, IN, USA, 47907-2046. Phone: 765-496-0568. Email: [samireau@purdue.edu](mailto:samireau@purdue.edu);

Angela J. Fong, University of Toronto, Faculty Kinesiology and Physical Education, Toronto, ON, Canada, M5S 2W6, Email: [aj.fong@mail.utoronto.ca](mailto:aj.fong@mail.utoronto.ca);

Catherine M. Sabiston, University of Toronto, Faculty Kinesiology and Physical Education, Toronto, ON, Canada, M5S 2W6. Phone: 416-978-5837. E-mail: [catherine.sabiston@utoronto.ca](mailto:catherine.sabiston@utoronto.ca).

Running title: Multiple Health Behavior Change Interventions

Correspondence should be sent to Steve Amireault, Purdue University, Department of Health and Kinesiology, 800 West Stadium Avenue, Lambert Fieldhouse, office 311A, West Lafayette, IN, USA, 47907-2046. Phone: 765-496-0568. E-mail: [samireau@purdue.edu](mailto:samireau@purdue.edu).

**Supplementary File 1.** The Electronic Databases Search Strategy

The electronic databases search strategy was developed for MEDLINE (via Pubmed; 1950 – 2015) and adapted for Cochrane Library (via Cochrane Central Register Controlled Trials; 1992 – 2015), and Psyc INFO (1806 – 2015). For all databases, the following search terms were used to search in title and abstract: ((exercise OR “physical activity”) AND diet OR nutri\* OR lifestyle OR health behavior) AND (cancer OR neoplasm\* OR tumor) AND (intervention\*). In addition, index or MeSH terms, were used. Full details of the electronic search, including limitations and specific research fields, for all databases are presented in Table 1 to Table 3. Note that books, book sections and conference abstracts were excluded.

Table 1. Documenting the Search- Cochrane Library

|                                                                           |                                                                                                                                                                                                                                     |
|---------------------------------------------------------------------------|-------------------------------------------------------------------------------------------------------------------------------------------------------------------------------------------------------------------------------------|
| Name of the database (range of dates)                                     | Cochrane Library (1992 – )                                                                                                                                                                                                          |
| Date of the search                                                        | July 31 <sup>th</sup> 2014<br>Updated February 19 <sup>th</sup> 2015 and November 2 <sup>nd</sup> 2015                                                                                                                              |
| Initials of the person who ran the search                                 | SA                                                                                                                                                                                                                                  |
| Limits : Cochrane Central Register<br>Controlled Trials (Clinical Trials) | Key words and MeSH terms:                                                                                                                                                                                                           |
| Search fields: Title/Abstract/keywords<br>and MeSH terms                  | S1- exercise<br>S2- exercise [MeSH]<br>S3- motor activity [MeSH]<br>S4- “physical activity”<br>S5- S1 or S2 or S3 or S4<br><br>S6- diet*<br>S7- diet [MeSH]<br>S8- food habit [MeSH]<br>S9- nutrition*<br>S10- S6 or S7 or S8 or S9 |
| Multiple behaviour #1 (Exercise + Diet)                                   | S11- S5 and S10                                                                                                                                                                                                                     |
| Multiple behaviour #2 (Lifestyle)                                         | S12- lifestyle*<br>S13- life style [MeSH]<br>S14- S12 or S13                                                                                                                                                                        |
| Combining multiple behaviour #1 and #2                                    | S15- S11 or S14                                                                                                                                                                                                                     |
| Cancer                                                                    | S16- cancer<br>S17- lymphoma<br>S18- neoplasm*<br>S19- tumor<br>S20- neoplasms [MeSH]<br>S21- S16 or S17 or S18 or S19 or S20                                                                                                       |
| Intervention                                                              | S22- intervention*<br>S23- health promotion [MeSH]<br>S24- intervention studies [MeSH]<br>S25- program evaluation [MeSH]<br>S26- S22 or S23 or S24 or S25                                                                           |
| Combined themes                                                           | S27- S15 and S21 and S26                                                                                                                                                                                                            |
| Number of hits                                                            | 606                                                                                                                                                                                                                                 |

Table 2. Documenting the Search- MEDLINE via Pubmed

|                                                                 |                                                                                                                                                                                                                                     |
|-----------------------------------------------------------------|-------------------------------------------------------------------------------------------------------------------------------------------------------------------------------------------------------------------------------------|
| Name of the database (range of dates)                           | MEDLINE (Pubmed: 1950 – )                                                                                                                                                                                                           |
| Date of the search                                              | July 31 <sup>th</sup> 2014<br>Updated February 19 <sup>th</sup> 2015 and November 2 <sup>nd</sup> 2015                                                                                                                              |
| Initials of the person who ran the search                       | SA                                                                                                                                                                                                                                  |
| Limits : English and French language publications               | Key words and MeSH terms:                                                                                                                                                                                                           |
| Search fields: Title/Abstract, MeSH terms, and Publication Type | S1- exercise<br>S2- exercise [MeSH]<br>S3- motor activity [MeSH]<br>S4- “physical activity”<br>S5- S1 or S2 or S3 or S4<br><br>S6- diet*<br>S7- diet [MeSH]<br>S8- food habit [MeSH]<br>S9- nutrition*<br>S10- S6 or S7 or S8 or S9 |
| Multiple behaviour #1 (Exercise + Diet)                         | S11- S5 and S10                                                                                                                                                                                                                     |
| Multiple behaviour #2 (Lifestyle)                               | S12- lifestyle*<br>S13- life style [MeSH]<br>S14- S12 or S13                                                                                                                                                                        |
| Combining multiple behaviour #1 and #2                          | S15- S11 or S14                                                                                                                                                                                                                     |
| Cancer                                                          | S16- cancer<br>S17- lymphoma<br>S18- neoplasm*<br>S19- tumor<br>S20- neoplasms [MeSH]<br>S21- S16 or S17 or S18 or S19 or S20                                                                                                       |
| Intervention                                                    | S22- intervention*<br>S23- health promotion [MeSH]<br>S24- intervention studies [MeSH]<br>S25- program evaluation [MeSH]<br>S26- S22 or S23 or S24 or S25                                                                           |
| Combined themes                                                 | S27- S15 and S21 and S26                                                                                                                                                                                                            |
|                                                                 | S28 trial                                                                                                                                                                                                                           |

|                                       |                                                                                                                                                                                                        |
|---------------------------------------|--------------------------------------------------------------------------------------------------------------------------------------------------------------------------------------------------------|
| Study design                          | S29 random*<br>S30 Randomized Controlled Trial [Publication Type]<br>S31 Controlled Clinical Trial [Publication Type]<br>S32 Clinical Trial [Publication Type]<br>S33- S28 or S29 or S30 or S31 or S32 |
| Combining themes and study design     | S34- S27 and S33                                                                                                                                                                                       |
| <hr/>                                 |                                                                                                                                                                                                        |
| Number of hits (with language limits) | 740                                                                                                                                                                                                    |
| <hr/>                                 |                                                                                                                                                                                                        |

Table 3. Documenting the Search- PsycINFO

|                                                   |                                                                                                                                                                                                                                                                                                                                                                |
|---------------------------------------------------|----------------------------------------------------------------------------------------------------------------------------------------------------------------------------------------------------------------------------------------------------------------------------------------------------------------------------------------------------------------|
| Name of the database (range of dates)             | PsycINFO (1806 – )                                                                                                                                                                                                                                                                                                                                             |
| Date of the search                                | July 31 <sup>th</sup> 2014 and updated February 10 <sup>th</sup> 2015<br>Updated February 19 <sup>th</sup> 2015 and November 2 <sup>nd</sup> 2015                                                                                                                                                                                                              |
| Initials of the person who ran the search         | SA                                                                                                                                                                                                                                                                                                                                                             |
| Limits : English and French language publications | Key words and Thesaurus terms:                                                                                                                                                                                                                                                                                                                                 |
| Search fields: Title/Abstract and Index terms     | S1- exercise<br>S2- exercise [Thesaurus term]/exp<br>S3-“physical activity”<br>S4- physical activity [Thesaurus term]/exp<br>S5- S1 or S2 or S3 or S4<br><br>S6- diet<br>S7- dietary<br>S8- diets [Thesaurus term]<br>S9- eating behavior [Thesaurus term]/exp<br>S10- nutrition<br>S11- nutrition [Thesaurus term]<br>S12- S6 or S7 or S8 or S9 or S10 or S11 |
| Multiple behaviour #1 (Exercise + Diet)           | S13- S5 and S12                                                                                                                                                                                                                                                                                                                                                |
| Multiple behaviour #2 (Lifestyle)                 | S14- lifestyle<br>S15- lifestyles<br>S16- life style [Thesaurus term]/exp<br>S17- S14 or S15 or S16                                                                                                                                                                                                                                                            |
| Combining multiple behaviour #1 and #2            | S18- S13 or S17                                                                                                                                                                                                                                                                                                                                                |
| Cancer                                            | S19- cancer<br>S20- lymphoma<br>S21- neoplasm<br>S22- tumor<br>S23- neoplasms [Thesaurus term]/exp<br>S24- S19 or S20 or S21 or S22 or S23                                                                                                                                                                                                                     |
| Intervention                                      | S25- intervention<br>S26- health promotion [Thesaurus term]/exp<br>S27- program evaluation [Thesaurus term]/exp<br>S28- S25 or S26 or S27                                                                                                                                                                                                                      |
| Combined themes                                   | S29- S18 and S24 and S28                                                                                                                                                                                                                                                                                                                                       |

|                                   |                                      |
|-----------------------------------|--------------------------------------|
|                                   | S30- trial                           |
|                                   | S31- random                          |
|                                   | S32- "Randomized Controlled Trial"   |
|                                   | S33- "Controlled Clinical Trial"     |
|                                   | S34- "Clinical Trial"                |
| Study design                      | S35- S29 or S30 or S31 or S32 or S33 |
| Combining themes and study design | S36- S29 and S35                     |
| Number of hits                    | 81                                   |

---

**Supplementary File 2.** Description of the formula used effect size (Cohen's *d* effect sizes; SMD) from information that is reported in the article

1- Obtaining Standard Mean Difference and its Variance from *F*-test

|                                                                                                                                                                  |                                                                                                                                                                                              |
|------------------------------------------------------------------------------------------------------------------------------------------------------------------|----------------------------------------------------------------------------------------------------------------------------------------------------------------------------------------------|
| Standard Mean Difference<br>(SMD) calculated from <i>F</i> -test<br>(when Mean Square of Error<br>not reported) <sup>1</sup><br>Variance (V) of SMD <sup>2</sup> | $\text{SMD} = \sqrt{F \times [(n_1 + n_2)/(n_1 \times n_2)] \times [(n_1 + n_2)/(n_1 + n_2 - 2)]}$ $V_{\text{SMD}} = [(n_1 + n_2)/(n_1 \times n_2)] + [\text{SMD}^2 / 2 \times (n_1 + n_2)]$ |
|------------------------------------------------------------------------------------------------------------------------------------------------------------------|----------------------------------------------------------------------------------------------------------------------------------------------------------------------------------------------|

2- Obtaining Standard Mean Difference and its Variance from Treatment Effects Reported as Proportion

Based on this nomenclature for 2 × 2 table of behavioral outcome by treatment:

|                   | Meeting behavioral<br>guideline | Not meeting behavioral<br>guideline |
|-------------------|---------------------------------|-------------------------------------|
| MHBC intervention | A                               | B                                   |
| Control           | C                               | D                                   |

|                                                                        |                                                                                                   |
|------------------------------------------------------------------------|---------------------------------------------------------------------------------------------------|
| Odds Ratio (OR) and its<br>variance were calculated <sup>3</sup> ; and | $\text{Odds Ratio} = (A \times D) / (B \times C)$ $V_{\text{Odds Ratio}} = 1/A + 1/B + 1/C + 1/D$ |
|------------------------------------------------------------------------|---------------------------------------------------------------------------------------------------|



|                                                            |                                                                                                        |
|------------------------------------------------------------|--------------------------------------------------------------------------------------------------------|
| they were converted into SMD<br>and $V_{SMD}$ <sup>4</sup> | $SMD = \text{Log Odds Ratio} \times \sqrt{3/\pi}$ $V_{SMD} = V_{\text{Log Odds Ratio}} \times 3/\pi^2$ |
|------------------------------------------------------------|--------------------------------------------------------------------------------------------------------|

### 3- Obtaining Within group Standard Deviation from Standard Error and Confidence Intervals, for Difference in Mean

|                                                                                                     |                                                                                |
|-----------------------------------------------------------------------------------------------------|--------------------------------------------------------------------------------|
| Standard Error (SE) calculated<br>from confidence intervals for<br>difference in means <sup>5</sup> | $SE = (\text{upper limit} - \text{lower limit}) / (2 \times t_{\text{value}})$ |
| Within group Standard<br>Deviation (SD) calculated from<br>SE <sup>5</sup>                          | $SD = SE / \sqrt{(1/n_1 + 1/n_2)}$                                             |

### 4- Combining Effect Sizes for Fruit and Vegetable Intake, When They are Reported Separately

|                       |                                                         |
|-----------------------|---------------------------------------------------------|
| Combine Standard Mean | $SMD_{FV} = 1/2 \times (\text{Mean}_F + \text{Mean}_V)$ |
|-----------------------|---------------------------------------------------------|

---

|                                        |                                                                                                                                                                                                                                                                                               |
|----------------------------------------|-----------------------------------------------------------------------------------------------------------------------------------------------------------------------------------------------------------------------------------------------------------------------------------------------|
| Difference ( $SMD_{FV}$ ) <sup>6</sup> |                                                                                                                                                                                                                                                                                               |
| Variance of $SMD_{FV}$ ( $V_{FV}$ )    | $V_{FV} = 1/2 \times V \times (1 + r)$<br><br>V: Variances for $SMD_F$ and $SMD_V$ were equal, thus the value of either $SMD_F$ or $SMD_V = V$ .<br><br>r: A correlation between Fruit and Vegetable intake of .41 was assumed based on the finding reported in Kellar & Abraham <sup>7</sup> |

---

## References

1. Thalheimer W. and Cook S. How to calculate effect sizes from published research articles: A simplified methodology. 2002. [http://work-learning.com/effect\\_sizes.htm](http://work-learning.com/effect_sizes.htm). Accessed July 8 2015.
2. Borenstein M., Hedges L. V., Higgins J. P. T. and Rothstein H. R. Effect Sizes Based on Means. In: Borenstein M., Hedges L. V., Higgins J. P. T. and Rothstein H. R., editors. *Introduction to Meta-Analysis*: John Wiley & Sons, Ltd.; 2009. pp. 21-32.
3. Borenstein M., Hedges L. V., Higgins J. P. T. and Rothstein H. R. Effect Sizes Based on Binary Data ( $2 \times 2$  Tables). In: Borenstein M., Hedges L. V., Higgins J. P. T. and Rothstein H. R., editors. *Introduction to Meta-Analysis*: John Wiley & Sons, Ltd.; 2009. pp. 33-40.
4. Borenstein M., Hedges L. V., Higgins J. P. T. and Rothstein H. R. Converting Among Effect Sizes. In: Borenstein M., Hedges L. V., Higgins J. P. T. and Rothstein H. R., editors. *Introduction to Meta-Analysis*: John Wiley & Sons, Ltd.; 2009. pp. 45-50.
5. Higgins J. P. T. and Green S. 7.7.3.3 Obtaining standard deviations from standard errors, confidence intervals, t values and P values for differences in means. In: Higgins J. P. T. and Green S., editors. *Cochrane Handbook for Systematic Reviews of Interventions*. Version 5.1.0 [updated March 2011]. [http://handbook.cochrane.org/chapter\\_7/7\\_7\\_3\\_3\\_obtaining\\_standard\\_deviations\\_from\\_standard\\_errors.htm](http://handbook.cochrane.org/chapter_7/7_7_3_3_obtaining_standard_deviations_from_standard_errors.htm). Accessed July 8 2015.
6. Borenstein M., Hedges L. V., Higgins J. P. T. and Rothstein H. R. Multiple Outcomes or Time-Points within a Study. In: Borenstein M., Hedges L. V., Higgins J. P. T. and Rothstein H. R., editors. *Introduction to Meta-Analysis*: John Wiley & Sons, Ltd.; 2009. pp. 225-238.

7. Kellar I, Abraham C. Randomized controlled trial of a brief research-based intervention promoting fruit and vegetable consumption. *Br J Health Psychol.* 2005;10:543-558.

**Supplementary File 3.** Characteristics of the participants, control group and outcome measures, and MHBC interventions.

Table 1. Characteristics of the participants, control group and outcome measures.

| <b>Reference (year)</b>      | <b>Study population (randomized)</b>                                                                 | <b>Type of cancer</b> | <b>Time since cancer diagnosis/treatment</b>              | <b>Measurement instrument of behavioral outcomes</b>                       | <b>Type of control group</b>                | <b>Risk of Bias Due to Conflict of Interest</b> |
|------------------------------|------------------------------------------------------------------------------------------------------|-----------------------|-----------------------------------------------------------|----------------------------------------------------------------------------|---------------------------------------------|-------------------------------------------------|
| Andersen et al. <sup>1</sup> | <i>N</i> = 227                                                                                       | Breast                | After primary treatment (surgery) but before radiotherapy | Healthy eating:<br>Food frequency questionnaire                            | No-treatment                                | Low                                             |
| Andersen et al. <sup>2</sup> | Mean age (years):<br>51                                                                              |                       |                                                           | Physical activity:<br>7-Day PA recall questionnaire                        |                                             |                                                 |
| Andersen et al. <sup>3</sup> | % Female: 100<br><br>Number of years of education: 14.8<br><br>BMI: Not reported<br><br>Country: USA |                       |                                                           |                                                                            |                                             |                                                 |
| Anderson et al. <sup>4</sup> | <i>N</i> = 55                                                                                        | Breast                |                                                           | After primary treatment                                                    |                                             |                                                 |
|                              | Mean age (years):<br>49                                                                              |                       |                                                           | Physical activity:<br>International Physical Activity Questionnaire (IPAQ) | Access to usual breast care nurse and other |                                                 |
|                              | % Female: 100<br><br>65.4% completed undergraduate program<br><br>BMI: Not                           |                       |                                                           |                                                                            |                                             |                                                 |

|                            |                                                                                                                                                                 |          |                                                                        |                                                                                                                                                                                                              |                                                                                                                                                                                    |                                                                                     |
|----------------------------|-----------------------------------------------------------------------------------------------------------------------------------------------------------------|----------|------------------------------------------------------------------------|--------------------------------------------------------------------------------------------------------------------------------------------------------------------------------------------------------------|------------------------------------------------------------------------------------------------------------------------------------------------------------------------------------|-------------------------------------------------------------------------------------|
|                            | reported                                                                                                                                                        |          |                                                                        |                                                                                                                                                                                                              | services<br>Breast<br>cancer<br>support<br>program                                                                                                                                 |                                                                                     |
|                            | Country:<br>Australia                                                                                                                                           |          |                                                                        |                                                                                                                                                                                                              |                                                                                                                                                                                    |                                                                                     |
| Bloom et al. <sup>5</sup>  | <i>N</i> = 404<br><br>Mean age (years):<br>≤ 50<br><br>% Female: 100<br><br>Education: 61%<br>completed college<br><br>BMI: Not<br>reported<br><br>Country: USA | Breast   | Cancer free ≥ 5<br>years after diagnosis;<br>aged ≤ 50 at<br>diagnosis | Healthy eating:<br>Self-report questionnaire<br>for assessing F&V and fat<br>intake<br><br>Block's food frequency<br>questionnaire (brief<br>version)<br><br>Physical activity:<br>Self-report questionnaire | Delayed<br>intervention-<br>Waitlist                                                                                                                                               | Unclear<br><br>Sources of<br>founding and<br>conflict of<br>interest<br>undisclosed |
| Bourke et al. <sup>6</sup> | <i>N</i> = 50<br><br>Mean age (years):<br>72<br><br>% Female: 0<br><br>Education: Not<br>reported<br><br>BMI: 27.7 kg/m <sup>2</sup><br><br>Country: UK         | Prostate | During treatment                                                       | Healthy eating:<br>3-day diet diaries<br><br>Physical activity:<br>Godin-Shephard Leisure-<br>Time Physical Activity<br>Questionnaire (GSLTPAQ)                                                              | Standard<br>care-<br>Participants<br>were<br>followed-up<br>in urology<br>clinic and<br>asked not to<br>change their<br>healthy<br>eating and<br>physical<br>activity<br>behaviors | Unclear<br><br>Sources of<br>foundlings<br>undisclosed                              |

|                              |                                                                                                                                |                              |                            |                                                                                                                                          |                                                                                                                               |                                             |
|------------------------------|--------------------------------------------------------------------------------------------------------------------------------|------------------------------|----------------------------|------------------------------------------------------------------------------------------------------------------------------------------|-------------------------------------------------------------------------------------------------------------------------------|---------------------------------------------|
| Bourke et al. <sup>7</sup>   | <i>N</i> = 18<br>Mean age (years): 69<br>% Female: 33<br>Education: Not reported<br>BMI: 26.5 kg/m <sup>2</sup><br>Country: UK | Colon                        | ~ 16 weeks after treatment | Healthy eating:<br>3-day diet diaries<br><br>Physical activity:<br>Godin-Shephard Leisure-Time Physical Activity Questionnaire (GSLTPAQ) | Standard of care-Followed-up in a colorectal cancer service                                                                   | Low                                         |
| Bourke et al. <sup>8</sup>   | <i>N</i> = 100<br>Mean age (years): 71<br>% Female: 0<br>Education: Not reported<br>BMI: 28.7 kg/m <sup>2</sup><br>Country: UK | Prostate                     | During treatment           | Healthy eating:<br>3-day diet diaries<br><br>Physical activity:<br>Godin-Shephard Leisure-Time Physical Activity Questionnaire (GSLTPAQ) | Standard of care-Followed-up in urology clinic. No restrictions were placed on healthy eating and physical activity behaviors | Low                                         |
| Campbell et al. <sup>9</sup> | <i>N</i> = 735<br>Mean age (years): 66.5<br>% Female: 49.4                                                                     | Colorectal ( <i>n</i> = 266) | 2-5 years after diagnosis  | Healthy eating:<br>Block's Food Frequency Questionnaire (modified version)<br><br>Physical activity:                                     | Attention-Received two mailings of generic health information                                                                 | Unclear<br>Conflict of interest undisclosed |

|                                                            |                                                                                                             |                     |                                      |                                                                                                              |                                                                                                                                   |     |
|------------------------------------------------------------|-------------------------------------------------------------------------------------------------------------|---------------------|--------------------------------------|--------------------------------------------------------------------------------------------------------------|-----------------------------------------------------------------------------------------------------------------------------------|-----|
|                                                            | Education: 78% completed high school                                                                        |                     |                                      | 7-Day Physical Activity Recall (modified version)                                                            | related to cancer topics                                                                                                          |     |
|                                                            | BMI: 29.1 kg/m <sup>2</sup>                                                                                 |                     |                                      |                                                                                                              |                                                                                                                                   |     |
|                                                            | Country: USA                                                                                                |                     |                                      |                                                                                                              |                                                                                                                                   |     |
| Demark-Wahnefried et al. <sup>10</sup>                     | <i>N</i> = 182<br>(all ≥ 65 years)                                                                          | Breast and prostate | Within 18 months of cancer diagnosis | Healthy eating:<br>Diet History Questionnaire                                                                | Attention-Received workbook and bimonthly telephone counseling for 6 months on general health information related to cancer topic | Low |
| <b>Protocol:</b><br>Demark-Wahnefried et al. <sup>11</sup> | Mean age (years): 72<br>% Female: 58<br>Education: 67% completed high school<br>BMI: 28.0 kg/m <sup>2</sup> |                     |                                      | 3-Day Dietary Recall<br>Physical activity:<br>Community Healthy Activities Model Program for Senior (CHAMPS) |                                                                                                                                   |     |
|                                                            | Country: USA                                                                                                |                     |                                      |                                                                                                              |                                                                                                                                   |     |
| Demark-Wahnefried et al. <sup>12</sup>                     | <i>N</i> = 543<br>Mean age (years): 57                                                                      | Breast and prostate | Within 9 months of cancer diagnosis  | Healthy eating:<br>Diet History Questionnaire                                                                | Attention-Received a personalized workbook that included cancer topic and health education materials on a healthful               | Low |
| Christy et al. <sup>13</sup>                               | % Female: 56                                                                                                |                     |                                      | Physical activity:<br>7-Day Physical Activity Recall                                                         |                                                                                                                                   |     |
| Mosher et al. <sup>14</sup>                                | Education: 58% completed college                                                                            |                     |                                      |                                                                                                              |                                                                                                                                   |     |



|                                                            |                                                                                                                                  |        |                                                  |                                                                                                                                                                        |                                                                                                                                |                                                 |
|------------------------------------------------------------|----------------------------------------------------------------------------------------------------------------------------------|--------|--------------------------------------------------|------------------------------------------------------------------------------------------------------------------------------------------------------------------------|--------------------------------------------------------------------------------------------------------------------------------|-------------------------------------------------|
| Ottenbacher et al. <sup>15</sup>                           | BMI: 27.6 kg/m <sup>2</sup>                                                                                                      |        |                                                  |                                                                                                                                                                        | diet and exercise                                                                                                              |                                                 |
|                                                            | Country: Canada and USA                                                                                                          |        |                                                  |                                                                                                                                                                        |                                                                                                                                |                                                 |
| <b>Protocol:</b><br>Demark-Wahnefried et al. <sup>16</sup> |                                                                                                                                  |        |                                                  |                                                                                                                                                                        |                                                                                                                                |                                                 |
| Demark-Wahnefried et al. <sup>17</sup>                     |                                                                                                                                  |        |                                                  |                                                                                                                                                                        |                                                                                                                                |                                                 |
| Demark-Wahnefried et al. <sup>18</sup>                     | <i>N</i> = 90<br>Mean age (years): 42<br>% Female: 100<br>Education: Not reported<br>BMI: 25.8 kg/m <sup>2</sup><br>Country: USA | Breast | During treatment                                 | Healthy eating:<br>Diet History Questionnaire (144 items)<br><br>Physical activity:<br>Longitudinal Study Physical Activity Questionnaire (LSPAQ)<br><br>Accelerometer | Attention-Calcium rich diet<br><br>Alternative treatment-Calcium rich diet with physical activity behavior change intervention | Unclear<br><br>Conflict of interest undisclosed |
| Demark-Wahnefried et al. <sup>19</sup>                     | <i>N</i> = 68 dyads (mother-daughter)<br>Mean age (years): 47.1<br>% Female: 100                                                 | Breast | After treatment, but within 5 years of diagnosis | Healthy eating:<br>2 random 24-hour dietary recalls<br><br>Physical activity:<br>Godin-Shephard Leisure-Time Physical Activity Questionnaire (GSLTPAQ);                | Attention-Received a personalized workbook that included cancer topic and health education                                     | Low                                             |

|                             |                                    |        |                            |                                                                                        |                                                                                                                                  |                                                       |
|-----------------------------|------------------------------------|--------|----------------------------|----------------------------------------------------------------------------------------|----------------------------------------------------------------------------------------------------------------------------------|-------------------------------------------------------|
|                             | Education: 34.3% completed college |        |                            | modified version)                                                                      | materials on a healthful diet and exercise                                                                                       |                                                       |
|                             | BMI: 32.0 kg/m <sup>2</sup>        |        |                            | Accelerometer                                                                          |                                                                                                                                  |                                                       |
|                             | Country: USA                       |        |                            |                                                                                        |                                                                                                                                  |                                                       |
| Djuric et al. <sup>20</sup> | <i>N</i> = 48                      | Breast | ≥ 3 months after treatment | Healthy eating: 3-day food records                                                     | Attention-Received mailed information that included cancer topic and health education materials on a healthful diet and exercise | High                                                  |
|                             | Mean age (years): 51.7             |        |                            | Physical activity: Lifestyle Questionnaire*<br>Physical activity-log*                  |                                                                                                                                  | Weight Watchers Group Inc. partly sponsored the study |
|                             | % Female: 100                      |        |                            |                                                                                        |                                                                                                                                  |                                                       |
|                             | Education: 63% completed college   |        |                            |                                                                                        |                                                                                                                                  |                                                       |
|                             | BMI: 35.5 kg/m <sup>2</sup>        |        |                            |                                                                                        |                                                                                                                                  |                                                       |
|                             | Country: USA                       |        |                            |                                                                                        |                                                                                                                                  |                                                       |
| Djuric et al. <sup>21</sup> | <i>N</i> = 40                      | Breast | During treatment           | Healthy eating: All Day screener for F&V (17-item; from the National Cancer Institute) | Attention-Received mailed information that included cancer topic and health education materials on a healthful diet and exercise | Unclear                                               |
|                             | Mean age (years): 52               |        |                            | Percent Energy from Fat screener (19-item; from the National Cancer Institute)         |                                                                                                                                  | Conflict of interest undisclosed                      |
|                             | % Female: 100                      |        |                            | 1 un-announced 24-hour recall                                                          |                                                                                                                                  |                                                       |
|                             | Education: Not reported            |        |                            | Physical activity: Women Health Initiative's                                           |                                                                                                                                  |                                                       |
|                             | BMI: 26.6 kg/m <sup>2</sup>        |        |                            |                                                                                        |                                                                                                                                  |                                                       |
|                             | Country: USA                       |        |                            |                                                                                        |                                                                                                                                  |                                                       |

|                               |                                                                                                                                                                                                  |            |                                               | questionnaire                                                                                                                                                            |                                                                                                                                                                    |                                                                                                                                                  |
|-------------------------------|--------------------------------------------------------------------------------------------------------------------------------------------------------------------------------------------------|------------|-----------------------------------------------|--------------------------------------------------------------------------------------------------------------------------------------------------------------------------|--------------------------------------------------------------------------------------------------------------------------------------------------------------------|--------------------------------------------------------------------------------------------------------------------------------------------------|
| Goodwin et al. <sup>22</sup>  | <i>N</i> = 338<br>(post-menopause)<br><br>Mean age (years):<br>61<br><br>% Female: 100<br><br>Education: Not reported<br><br>BMI: 31.3 kg/m <sup>2</sup><br><br>Country: Canada                  | Breast     | After treatment                               | Healthy eating:<br>Montreal Food Frequency<br>Questionnaire<br><br>Physical activity:<br>International Physical<br>Activity Questionnaire<br>(IPAQ)                      | Attention-<br>Received<br>mailed<br>information<br>that included<br>cancer topic<br>and health<br>education<br>materials on<br>a healthful<br>diet and<br>exercise | High<br><br>Pfizer and<br>Novartis<br>Pharmaceutical<br>partly sponsored<br>the study.<br><br>Conflict of<br>interests shared<br>by on co-author |
| Greenlee et al. <sup>23</sup> | <i>N</i> = 42<br>(Hispanic and<br>black)<br><br>Mean age (years):<br>51<br><br>% Female: 100<br><br>Education: 21.4%<br>completed college<br><br>BMI: 33.2 kg/m <sup>2</sup><br><br>Country: USA | Breast     | ≥ 6 months after<br>treatment                 | Healthy eating:<br>Block's Food Frequency<br>Questionnaire<br><br>Physical activity:<br>Kaiser physical activity<br>survey<br><br>Computerized Curves<br>attendance logs | Delayed<br>intervention-<br>Waitlist                                                                                                                               | Low                                                                                                                                              |
| Hawkes et al. <sup>24</sup>   | <i>N</i> = 410<br><br>Mean age (years):                                                                                                                                                          | Colorectal | Within 12 months<br>after cancer<br>diagnosis | Healthy eating:<br>Cancer Council Victoria<br>Food Frequency                                                                                                             | Attention-<br>Received<br>mailed                                                                                                                                   | Low                                                                                                                                              |

|                             |                                  |                     |                                             |                                                                                                            |                                                                                                        |     |
|-----------------------------|----------------------------------|---------------------|---------------------------------------------|------------------------------------------------------------------------------------------------------------|--------------------------------------------------------------------------------------------------------|-----|
| <b>Protocol</b>             | 66                               |                     |                                             | Questionnaire                                                                                              | information that included cancer topic and health education materials on a healthful diet and exercise |     |
| Hawkes et al. <sup>25</sup> | % Female: 46                     |                     |                                             | Physical activity: Godin-Shephard Leisure-Time Physical Activity Questionnaire (GSLTPAQ; modified version) |                                                                                                        |     |
|                             | Education: Not reported          |                     |                                             |                                                                                                            |                                                                                                        |     |
|                             | BMI: 25.5 kg/m <sup>2</sup>      |                     |                                             |                                                                                                            |                                                                                                        |     |
|                             | Country: Australia               |                     |                                             |                                                                                                            |                                                                                                        |     |
| Hébert et al. <sup>26</sup> | <i>N</i> = 54 dyads (partners)   | Prostate            | After treatment                             | Healthy eating: 3 randomly selected days 24-Hour Dietary Recall                                            | Delayed intervention-Waitlist                                                                          | Low |
|                             | Mean age (years): 70             |                     |                                             | Physical activity: Community Healthy Activities Model Program for Senior (CHAMPS)                          |                                                                                                        |     |
|                             | % Female: 0                      |                     |                                             |                                                                                                            |                                                                                                        |     |
|                             | Education: 44% completed college |                     |                                             |                                                                                                            |                                                                                                        |     |
|                             | BMI: 29.1 kg/m <sup>2</sup>      |                     |                                             |                                                                                                            |                                                                                                        |     |
|                             | Country: USA                     |                     |                                             |                                                                                                            |                                                                                                        |     |
| Hung et al. <sup>27</sup>   | <i>N</i> = 37                    | Lymphoma<br>Myeloma | After treatment (post PBSC transplantation) | Healthy eating: Interviewer-administered 7-day diet history                                                | Standard of care- Received best practice nutrition counselling and                                     | Low |
|                             | Mean age (years): 58.7           |                     |                                             | Physical activity: Active Australia Survey*                                                                |                                                                                                        |     |
|                             | % Female: 46                     |                     |                                             |                                                                                                            |                                                                                                        |     |

|                            |                                                                        |                                                 |                             |                                                                            |                                                                                                                                                              |         |
|----------------------------|------------------------------------------------------------------------|-------------------------------------------------|-----------------------------|----------------------------------------------------------------------------|--------------------------------------------------------------------------------------------------------------------------------------------------------------|---------|
|                            | Education: Not reported                                                |                                                 |                             |                                                                            | assessment, and an intensive nutrition support during hospitalization involving dietary reviews and the use of high protein and –energy nutrition supplement |         |
|                            | BMI: 40.5% were overweight or obese (BMI $\geq$ 25 kg/m <sup>2</sup> ) |                                                 |                             |                                                                            |                                                                                                                                                              |         |
|                            | Country: USA                                                           |                                                 |                             |                                                                            |                                                                                                                                                              |         |
| James et al. <sup>28</sup> | <i>N</i> = 174                                                         | Bowel/ Colorectal                               | After treatment             | Healthy eating: Diet Questionnaire for Epidemiological Studies (Version 2) | Delayed intervention- Waitlist                                                                                                                               | Low     |
| <b>Protocol</b>            | Mean age (years): 57                                                   | Breast Prostate Melanoma                        |                             |                                                                            |                                                                                                                                                              |         |
| James et al. <sup>29</sup> | % Female: 77.4                                                         | Non- Hodgkins Lymphoma leukemia Ovarian Thyroid |                             | Physical activity: Pedometer (Yamax SW200) PA log Active Australia survey  |                                                                                                                                                              |         |
|                            | Education: 35% completed university                                    |                                                 |                             |                                                                            |                                                                                                                                                              |         |
|                            | BMI: Not reported                                                      |                                                 |                             |                                                                            |                                                                                                                                                              |         |
|                            | Country: Australia                                                     |                                                 |                             |                                                                            |                                                                                                                                                              |         |
| Kim et al. <sup>30</sup>   | <i>N</i> = 45                                                          | Breast                                          | Within 2 years of diagnosis | Healthy eating: Diet Quality Inventory                                     | Not specified                                                                                                                                                | Unclear |

|                               |                                           |                                  |                                       |                                                                                  |                                                                                                                                      |                                         |
|-------------------------------|-------------------------------------------|----------------------------------|---------------------------------------|----------------------------------------------------------------------------------|--------------------------------------------------------------------------------------------------------------------------------------|-----------------------------------------|
|                               | Mean age (years):<br>45.9                 |                                  |                                       | (South Korean version)                                                           |                                                                                                                                      | Conflict of<br>interests<br>undisclosed |
|                               | % Female: 100                             |                                  |                                       | Physical activity:<br>International Physical<br>Activity Questionnaire<br>(IPAQ) |                                                                                                                                      |                                         |
|                               | Education: 35%<br>completed<br>university |                                  |                                       |                                                                                  |                                                                                                                                      |                                         |
|                               | BMI: 22.5 kg/m <sup>2</sup>               |                                  |                                       |                                                                                  |                                                                                                                                      |                                         |
|                               | Country: South<br>Korea                   |                                  |                                       |                                                                                  |                                                                                                                                      |                                         |
| Lee et al. <sup>31</sup>      | <i>N</i> = 59                             | Breast                           | After treatment                       | Healthy eating:<br>3-day dietary recall                                          | Attention-<br>Received<br>mailed<br>information<br>that included<br>education<br>materials on<br>a healthful<br>diet and<br>exercise | Low                                     |
|                               | Mean age (years):<br>42.4                 |                                  |                                       | Diet Quality Inventory<br>(South Korean version)                                 |                                                                                                                                      |                                         |
|                               | % Female: 100                             |                                  |                                       | Physical activity:<br>7-day exercise diaries*                                    |                                                                                                                                      |                                         |
|                               | Education: 73%<br>completed college       |                                  |                                       |                                                                                  |                                                                                                                                      |                                         |
|                               | BMI: Not<br>reported                      |                                  |                                       |                                                                                  |                                                                                                                                      |                                         |
|                               | Country: South<br>Korea                   |                                  |                                       |                                                                                  |                                                                                                                                      |                                         |
| Morey et<br>al. <sup>32</sup> | <i>N</i> = 641                            | Colorectal<br>Breast<br>Prostate | Within 5 years of<br>cancer treatment | Healthy eating:<br>24-Hour Dietary Recall                                        | Delayed<br>intervention-<br>Waitlist                                                                                                 | Low                                     |
| Demark-<br>Wahnefried         | Mean age (years):<br>73; all ≥ 65 years   |                                  |                                       | Physical activity:<br>Community Healthy                                          |                                                                                                                                      |                                         |

|                                                |                                                                                                               |                                                                      |                                                             |                                                                                                                                                                |                                                                                                                                                       |                                                            |
|------------------------------------------------|---------------------------------------------------------------------------------------------------------------|----------------------------------------------------------------------|-------------------------------------------------------------|----------------------------------------------------------------------------------------------------------------------------------------------------------------|-------------------------------------------------------------------------------------------------------------------------------------------------------|------------------------------------------------------------|
| et al. <sup>33</sup>                           | % Female: 54                                                                                                  |                                                                      |                                                             | Activities Model Program for Senior (CHAMPS)                                                                                                                   |                                                                                                                                                       |                                                            |
| <b>Protocol</b><br>Snyder et al. <sup>34</sup> | Education: 62% has some college education                                                                     |                                                                      |                                                             |                                                                                                                                                                |                                                                                                                                                       |                                                            |
|                                                | BMI: 29.2 kg/m <sup>2</sup>                                                                                   |                                                                      |                                                             |                                                                                                                                                                |                                                                                                                                                       |                                                            |
|                                                | Country: Canada, UK, USA                                                                                      |                                                                      |                                                             |                                                                                                                                                                |                                                                                                                                                       |                                                            |
| Moyer-Mileur et al. <sup>35</sup>              | <i>N</i> = 14<br>Mean age (years): 6.5<br>% Female: 54<br>Education: N/A<br>BMI: Not reported<br>Country: USA | Lymphoblastic<br>Leukemia                                            | During treatment                                            | Healthy eating: 3-day food intake Recall (completed by parents)*<br><br>Physical activity: Activity GRAM questionnaire (completed by parents)<br><br>Pedometer | Standard of care- Provided recommendations to eat a well-balanced diet, take multivitamin with low or no folic acid, and to perform physical activity | Unclear<br><br>Conflict of interest undisclosed            |
| O'Carroll Bantum et al. <sup>36</sup>          | <i>N</i> = 352<br>Mean age (years): 51<br>% Female: 82<br>Number of years                                     | Breast<br>Endometrial<br>Uterine<br>Ovarian<br>Other types of cancer | At least 4 weeks, but not more than 5 years after treatment | Healthy eating: Block's Food Frequency Questionnaire<br><br>Physical activity: Godin-Shephard Leisure-Time Physical Activity Questionnaire (GSLTPAQ)           | Delayed intervention- Waitlist                                                                                                                        | High<br><br>Conflict of interest shared by the lead author |

|                                    |                                    |             |                                               |                                                                                          |                                                                                                            |                                                |
|------------------------------------|------------------------------------|-------------|-----------------------------------------------|------------------------------------------------------------------------------------------|------------------------------------------------------------------------------------------------------------|------------------------------------------------|
|                                    | of education: 16                   |             |                                               |                                                                                          |                                                                                                            |                                                |
|                                    | BMI: Not reported                  |             |                                               |                                                                                          |                                                                                                            |                                                |
|                                    | Country: USA                       |             |                                               |                                                                                          |                                                                                                            |                                                |
| Ornish et al. <sup>37</sup>        | <i>N</i> = 93                      | Prostate    | Elected not to undergo conventional treatment | HE: Food Frequency Questionnaire (unknown source)*                                       | Standard of care- Asked to follow the advice of their physician regarding lifestyles changes               | High                                           |
| <b>Protocol</b>                    | Mean age (years): 66               |             |                                               |                                                                                          |                                                                                                            | Conflict of interest shared by the lead author |
| Ornish et al. <sup>38</sup>        | % Female: 0                        |             |                                               | Physical Activity: Self-report questionnaire (unknown source)*                           |                                                                                                            |                                                |
|                                    | Education: Not specified           |             |                                               | Pedometer                                                                                |                                                                                                            |                                                |
|                                    | BMI: not specified                 |             |                                               |                                                                                          |                                                                                                            |                                                |
|                                    | Country: USA                       |             |                                               |                                                                                          |                                                                                                            |                                                |
| Von Gruenigen et al. <sup>39</sup> | <i>N</i> = 45                      | Endometrial | After treatment                               | Healthy eating: Two 24-Hour Dietary Recall                                               | Standard of care- Received 3 counseling sessions regarding overall health concerns; Did not receive advice | Unclear                                        |
|                                    | Mean age (years): 55               |             |                                               | Physical activity: Godin-Shephard Leisure-Time Physical Activity Questionnaire (GSLTPAQ) |                                                                                                            | Conflict of interest undisclosed               |
|                                    | % Female: 100                      |             |                                               |                                                                                          |                                                                                                            |                                                |
|                                    | Education: 35.6% completed college |             |                                               |                                                                                          |                                                                                                            |                                                |
|                                    | BMI: 42.3                          |             |                                               |                                                                                          |                                                                                                            |                                                |



|                                    |                             |             |                                    |                                                                                             |                                                                                        |                                           |
|------------------------------------|-----------------------------|-------------|------------------------------------|---------------------------------------------------------------------------------------------|----------------------------------------------------------------------------------------|-------------------------------------------|
| Country: Ireland                   |                             |             |                                    | related to healthy eating and physical activity                                             |                                                                                        |                                           |
| Von Gruenigen et al. <sup>40</sup> | <i>N</i> = 75               | Endometrial | Within 3 years of cancer diagnosis | Healthy eating:<br>Two 24-Hour Dietary Recalls                                              | Standard of care-<br>Received 3 counseling sessions regarding overall health concerns; | Unclear<br>Sources of funding undisclosed |
|                                    | Mean age (years):<br>58     |             |                                    | Physical activity:<br>Godin-Shephard Leisure-Time Physical Activity Questionnaire (GSLTPAQ) | Received an informational brochure on healthy eating and physical activity.            |                                           |
|                                    | % Female: 100               |             |                                    | Pedometer                                                                                   |                                                                                        |                                           |
|                                    | BMI: 36.4 kg/m <sup>2</sup> |             |                                    |                                                                                             |                                                                                        |                                           |
|                                    | Country: USA                |             |                                    |                                                                                             |                                                                                        |                                           |

\*Measurement instrument of unknown validity

Table 2. Characteristics of the Multiple Health Behavior Change Intervention.

| Reference (year) | Targeted behaviors | Theoretical framework | Approach to MHBC | Modalities and Delivery Mode | Behavior change techniques | Effect size [95%CI] of the MHBC intervention on healthy eating and physical activity behaviors |           |
|------------------|--------------------|-----------------------|------------------|------------------------------|----------------------------|------------------------------------------------------------------------------------------------|-----------|
|                  |                    |                       |                  |                              |                            | Post-intervention                                                                              | Follow-up |

|                              |                   |                         |              |                                                                                             |                                                                 |                                                                                                        |                                                                                                                                    |
|------------------------------|-------------------|-------------------------|--------------|---------------------------------------------------------------------------------------------|-----------------------------------------------------------------|--------------------------------------------------------------------------------------------------------|------------------------------------------------------------------------------------------------------------------------------------|
| Andersen et al. <sup>1</sup> | Healthy eating    | None reported           | Simultaneous | <b>Dose:</b><br>18 group sessions (1.5 hours); 4 sessions devoted to health behavior change | Prompt self-monitoring of behavior (HE)                         | <b>Healthy eating:</b><br>F&V intake<br><i>Assessed but data not reported</i>                          | <b>Healthy eating:</b><br>F&V intake<br><i>Unclear</i>                                                                             |
| Andersen et al. <sup>2</sup> | Physical activity |                         |              |                                                                                             | Food substitution <sup>§</sup> (HE)                             | Fat intake (avoiding fat) <sup>a</sup> :<br>-0.28 [-0.55; -0.01]                                       | Fat intake (avoiding fat)<br><i>Unclear</i>                                                                                        |
| Andersen et al. <sup>3</sup> | Smoking           |                         |              | <b>Material:</b><br>Food intake diary<br>Sampling of low-fat snacks                         | Provide information on consequences of behavior in general (HE) | Diet quality (healthy food) <sup>a</sup> :<br>0.32 [0.03; 0.60]                                        | Diet quality (healthy food)<br><i>Assessed but data not reported for the control group</i>                                         |
|                              |                   |                         |              | <b>Providers:</b><br>Clinical psychologist                                                  | Provide instruction on how to perform the behavior (PA)         | <b>Physical activity:</b><br>Moderate-to-vigorous physical activity <sup>a</sup><br>0.25 [-0.02; 0.53] | <b>Physical activity:</b><br>Moderate-to-vigorous physical activity<br><i>Assessed but data not reported for the control group</i> |
|                              |                   |                         |              | <b>Delivery:</b><br>In-person                                                               | Stress management/<br>Emotional control training                |                                                                                                        |                                                                                                                                    |
|                              |                   |                         |              | <b>Duration of the intervention:</b><br>4 months (17 weeks)                                 |                                                                 |                                                                                                        |                                                                                                                                    |
|                              |                   |                         |              | <b>Follow-up:</b><br>8 months (34 weeks)                                                    |                                                                 |                                                                                                        |                                                                                                                                    |
| Anderson et al. <sup>4</sup> | Alcohol intake    | Social cognitive theory | Simultaneous | <b>Dose:</b><br>Follow-up calls weekly                                                      | Provide information on consequences                             | <b>Healthy eating:</b><br>Fruit intake<br>-0.23 [-0.78; 0.32]                                          | N/A                                                                                                                                |

|                           |                   |                              |                                                                  |                                                         |                                                                                                         |                                                                                                  |
|---------------------------|-------------------|------------------------------|------------------------------------------------------------------|---------------------------------------------------------|---------------------------------------------------------------------------------------------------------|--------------------------------------------------------------------------------------------------|
|                           | Healthy eating    |                              | (first 2 wk)                                                     | of behavior in general (HE + PA)                        | Vegetable intake<br>-0.09 [-0.64; 0.46]                                                                 | N/A                                                                                              |
|                           | Physical activity |                              | (throughout the 12 wk)                                           | Goal setting (HE + PA)                                  | F&V intake<br>-0.16 [-0.61; 0.29]                                                                       | N/A                                                                                              |
|                           |                   |                              | <b>Material:</b><br>Journal<br>Book<br>Health education material | Prompt self-monitoring (HE + PA)                        | Fat intake (saturated)<br>0.09 [-0.32; 0.45]                                                            | N/A                                                                                              |
|                           |                   |                              | <b>Providers:</b><br>Nurse                                       | Prompt self-monitoring (outcomes)                       | Total energy intake<br>0.04 [-0.51; 0.59]                                                               | N/A                                                                                              |
|                           |                   |                              | <b>Delivery:</b><br>In- person<br>Phone<br>Web<br>E-mails        | Action planning (PA)<br>Provide feedback on (?)         | <b>Physical activity:</b><br>Moderate-to-vigorous physical activity <sup>b</sup><br>-0.22 [-0.83; 0.39] | N/A                                                                                              |
|                           |                   |                              | <b>Duration of the intervention:</b><br>3 months (12 weeks)      | Plan social support/social change<br>Follow-up prompts  |                                                                                                         |                                                                                                  |
| Bloom et al. <sup>5</sup> | Healthy eating    | Social support               | Simultaneous                                                     | <b>Dose:</b><br>3 one-day workshops (6 hours/ workshop) | Provide information on consequences of behavior in general (HE + PA)                                    | <b>Healthy eating:</b><br>F&V intake (eating ≥ 5 servings/d) <sup>b</sup><br>-0.03 [-0.27; 0.21] |
|                           | Physical activity | Network conceptual framework |                                                                  |                                                         |                                                                                                         |                                                                                                  |

---

|                                                                                                                                       |                                                                                               |     |                                                                                                   |
|---------------------------------------------------------------------------------------------------------------------------------------|-----------------------------------------------------------------------------------------------|-----|---------------------------------------------------------------------------------------------------|
| <b>Material:</b><br>Stretch bands                                                                                                     | Provide instruction on how to perform the behavior (weight-bearing PA)                        | N/A | Fat intake (eating low-fat or non-fat foods most of the time) <sup>b</sup><br>-0.07 [-0.29; 0.16] |
| <b>Providers:</b><br>Medical oncologist, pharmacist, gynecologist, attorneys, exercise physiologist, representative of the WHEL study | Provide information on where and when to perform the behavior (HE)                            | N/A | <b>Physical activity:</b><br>Exercising $\geq 2$ days/wk <sup>b</sup><br>-0.05 [-0.32; 0.22]      |
| <b>Delivery:</b><br>In- person                                                                                                        | Model/<br>Demonstrate the behavior (PA)                                                       |     |                                                                                                   |
| <b>Duration of the intervention:</b><br>3 months (13 weeks-monthly interval)                                                          | Barrier identification/<br>Problem solving (PA)                                               |     |                                                                                                   |
| <b>Follow-up:</b><br>3 months (13 weeks)                                                                                              | General communication skills training<br><br>Stress management/<br>Emotional control training |     |                                                                                                   |

---

|                            |                |                |                              |                                                                                                                                                                                                                                                                                                                                                                                                            |                                                                                                                                                                                                                            |                                                                                                                                                                                                             |                                                                                                                                                                                                           |
|----------------------------|----------------|----------------|------------------------------|------------------------------------------------------------------------------------------------------------------------------------------------------------------------------------------------------------------------------------------------------------------------------------------------------------------------------------------------------------------------------------------------------------|----------------------------------------------------------------------------------------------------------------------------------------------------------------------------------------------------------------------------|-------------------------------------------------------------------------------------------------------------------------------------------------------------------------------------------------------------|-----------------------------------------------------------------------------------------------------------------------------------------------------------------------------------------------------------|
| Bourke et al. <sup>6</sup> | Alcohol Intake | None specified | Simultaneous <i>-tapered</i> | <p><b>Dose:</b><br/>18 supervised exercise sessions (30 min/session)</p> <p>6 small group healthy- eating seminars (15-20 min /seminar)</p> <p><b>Material:</b><br/>Nutrition advice pack</p> <p><b>Provider:</b><br/>Exercise physiologist</p> <p><b>Delivery:</b><br/>In-person</p> <p><b>Duration of the intervention:</b><br/>3 months (13 weeks)</p> <p><b>Follow-up:</b><br/>6 months (26 weeks)</p> | <p>Prompt self-monitoring (PA)</p> <p>Prompt practice (PA)</p> <p>Prompting generalisation of a target behavior (PA)</p> <p>Provide instruction on how to perform the behaviors (HE)</p> <p>Follow-up prompts □ □ (PA)</p> | <p><b>Healthy Eating:</b><br/>Fat intake<br/>-1.00 [-1.59; -0.41]</p> <p>Total energy intake<br/>-0.66 [-1.23; -0.29]</p> <p><b>Physical Activity:</b><br/>Total LTPA<sup>c</sup><br/>1.22 [0.62; 1.83]</p> | <p><b>Healthy Eating:</b><br/>Fat intake<br/><i>Not assessed</i></p> <p>Total energy intake<br/><i>Not assessed</i></p> <p><b>Physical activity:</b><br/>Total LTPA<sup>c</sup><br/>0.92 [0.34; 1.51]</p> |
| Bourke et al. <sup>7</sup> | Alcohol intake | None specified | Simultaneous <i>-tapered</i> | <p><b>Dose:</b><br/>18 Supervised exercise sessions</p>                                                                                                                                                                                                                                                                                                                                                    | <p>Prompt self-monitoring (PA)</p>                                                                                                                                                                                         | <p><b>Healthy Eating:</b><br/>Fat intake<br/>-0.93 [-1.92; 0.05]</p>                                                                                                                                        | <p>N/A</p>                                                                                                                                                                                                |

|                            |                   |                |                                                                |                                                                  |                                                                 |                                                                            |                                                              |
|----------------------------|-------------------|----------------|----------------------------------------------------------------|------------------------------------------------------------------|-----------------------------------------------------------------|----------------------------------------------------------------------------|--------------------------------------------------------------|
|                            | Healthy eating    |                | (30 min/session)                                               |                                                                  | Prompt practice (PA)                                            | Total energy intake                                                        | N/A                                                          |
|                            | Physical activity |                | 6 small group healthy-eating seminars (15-20 min/seminar)      |                                                                  | Prompting generalisation of a target behavior (PA)              | -0.12 [-1.04; 0.81]                                                        |                                                              |
|                            |                   |                | <b>Material:</b><br>Exercise workbook<br>Nutrition advice pack |                                                                  | Provide instruction on how to perform the behaviors (HE + PA)   | <b>Physical activity:</b><br>Total LTPA <sup>d</sup><br>0.78 [-0.18; 1.75] | N/A                                                          |
|                            |                   |                | <b>Provider:</b><br>Exercise physiologist                      |                                                                  | Follow-up prompts □ □ (PA)                                      | All effect sizes are adjusted for baseline behavior                        |                                                              |
|                            |                   |                | <b>Delivery:</b><br>In-person                                  |                                                                  |                                                                 |                                                                            |                                                              |
|                            |                   |                | <b>Duration of the intervention:</b><br>3 months (13 weeks)    |                                                                  |                                                                 |                                                                            |                                                              |
| Bourke et al. <sup>8</sup> | Alcohol           | None specified | Simultaneous -tapered                                          | <b>Dose:</b><br>18 Supervised exercise sessions (30 min/session) | Provide information on consequences of behavior in general (PA) | <b>Healthy eating:</b><br>Fat intake <sup>c</sup><br>-0.43 [-0.83; -0.03]  | <b>Healthy eating:</b><br>Fat intake:<br><i>Not assessed</i> |
|                            | Healthy eating    |                |                                                                |                                                                  |                                                                 |                                                                            |                                                              |
|                            | Physical activity |                |                                                                | 6 small group healthy-eating                                     | Goal setting                                                    | Total energy intake <sup>c</sup><br>-0.22 [-0.61; 0.17]                    | Total energy intake<br><i>Not assessed</i>                   |

---

|                                                                    |                                                                  |                                                                           |                                                                           |
|--------------------------------------------------------------------|------------------------------------------------------------------|---------------------------------------------------------------------------|---------------------------------------------------------------------------|
| seminars<br>(15-20 min/<br>seminar)                                | (HE + PA)                                                        |                                                                           |                                                                           |
| <b>Materials:</b><br>Exercise<br>workbook                          | Barrier<br>identification/<br>Problem<br>solving<br>(HE + PA)    | <b>Physical activity:</b><br>Total LTPA <sup>c</sup><br>0.85 [0.44; 1.26] | <b>Physical activity:</b><br>Total LTPA <sup>c</sup><br>0.42 [0.02; 0.81] |
| Nutrition advice<br>pack                                           | Prompt review<br>of behavioral<br>goals<br>(HE + PA)             | All effect sizes are<br>adjusted for<br>baseline behavior                 | Effect size is<br>adjusted for<br>baseline behavior                       |
| <b>Provider:</b><br>Exercise<br>physiologist                       | Prompt self-<br>monitoring<br>(PA)                               |                                                                           |                                                                           |
| <b>Delivery:</b><br>In-person                                      | Prompt practice<br>(PA)                                          |                                                                           |                                                                           |
| <b>Duration of the<br/>intervention:</b><br>3 months<br>(13 weeks) | Prompting<br>generalization<br>of a target<br>behavior (PA)      |                                                                           |                                                                           |
| <b>Follow-up:</b><br>6 months<br>(26 weeks)                        | Provide<br>feedback on<br>behavioral<br>performance<br>(HE + PA) |                                                                           |                                                                           |
|                                                                    | Provide<br>instruction on                                        |                                                                           |                                                                           |

---

|                              |                                         |                                                        |              |                                                                                                                                                                                                                                                               |                                                                                                                                                                                                             |                                                                                                                                                                                                                                             |                |
|------------------------------|-----------------------------------------|--------------------------------------------------------|--------------|---------------------------------------------------------------------------------------------------------------------------------------------------------------------------------------------------------------------------------------------------------------|-------------------------------------------------------------------------------------------------------------------------------------------------------------------------------------------------------------|---------------------------------------------------------------------------------------------------------------------------------------------------------------------------------------------------------------------------------------------|----------------|
|                              |                                         |                                                        |              |                                                                                                                                                                                                                                                               | how to perform the behaviors (HE + PA)                                                                                                                                                                      |                                                                                                                                                                                                                                             |                |
|                              |                                         |                                                        |              |                                                                                                                                                                                                                                                               | Facilitate social comparison □ □ (HE)                                                                                                                                                                       |                                                                                                                                                                                                                                             |                |
|                              |                                         |                                                        |              |                                                                                                                                                                                                                                                               | Plan social support/social change (PA)                                                                                                                                                                      |                                                                                                                                                                                                                                             |                |
| Campbell et al. <sup>9</sup> | Healthy eating<br><br>Physical activity | Social Cognitive Theory<br><br>Trans-theoretical Model | Simultaneous | <b>Dose:</b><br>4 computer-tailored and personalized newsletters<br><br>4 motivational interviewing sessions (20 min/session)<br><br><b>Provider:</b><br>Research team members with training in motivational interviewing<br><br><b>Delivery:</b><br><br>Mail | Barrier identification/ Problem solving (HE + PA)<br><br>Provide feedback on behavioral performance (HE + PA)<br><br>Plan social support/social change (HE + PA)<br><br>Motivational Interviewing (HE + PA) | <b>Healthy eating:</b><br>F&V intake<br>0.20 [-0.88; 1.28]<br><br><b>Physical activity:</b><br>No difference in moderate-to-vigorous physical activity ( $p > 0.05$ )<br><i>Data required for effect size calculation were not reported</i> | N/A<br><br>N/A |



|                                                           |                   |                         |            |                                                                             |                                                                         |                                                                                                     |                                                                                                     |
|-----------------------------------------------------------|-------------------|-------------------------|------------|-----------------------------------------------------------------------------|-------------------------------------------------------------------------|-----------------------------------------------------------------------------------------------------|-----------------------------------------------------------------------------------------------------|
|                                                           |                   |                         |            | Phone                                                                       | Testimonial written by cancer survivors <sup>g</sup>                    |                                                                                                     |                                                                                                     |
|                                                           |                   |                         |            | <b>Duration of the intervention:</b><br>6 months<br>(26 weeks)              |                                                                         |                                                                                                     |                                                                                                     |
| Demark-Wahnefried et al. <sup>10</sup>                    | Healthy eating    | Social cognitive theory | Sequential | <b>Dose:</b><br>12 counseling sessions<br>(20-30 min/session)               | Provide information on consequences of behavior in general<br>(HE + PA) | <b>Healthy Eating:</b><br>F&V intake<br>0.21 [-0.09; 0.51]<br><br>Fat intake<br>-0.07 [-0.38; 0.23] | <b>Healthy Eating</b><br>F&V intake<br>-0.05 [-0.36; 0.26]<br><br>Fat intake<br>-0.10 [-0.41; 0.21] |
| <b>Protocol</b><br>Demark-Wahnefried et al. <sup>11</sup> | Physical activity | Trans-theoretical Model |            | <b>Material:</b><br>Personalized workbook<br>(Including HE and PA logbooks) | Goal-setting<br>(HE + PA)                                               | Diet quality<br>0.36 [0.06; 0.67]                                                                   | Diet quality<br>0.07 [-0.24; 0.38]                                                                  |
|                                                           |                   |                         |            | Pedometer                                                                   | Prompt self-monitoring of behavior<br>(HE + PA)                         | <b>Physical activity</b><br>Frequency of exercise session<br>0.11 [-0.19; 0.41]                     | <b>Physical activity</b><br>Frequency of exercise session<br>-0.08 [-0.39; 0.23]                    |
|                                                           |                   |                         |            | <b>Providers:</b><br>Dietician,<br>Exercise physiologist                    | Provide feedback on performance<br>(HE + PA)                            | Physical activity energy expenditure<br>0.19 [-0.12; 0.49]                                          | Physical activity energy expenditure<br>-0.26 [-0.57; 0.06]                                         |
|                                                           |                   |                         |            | <b>Delivery:</b><br>Phone                                                   | Provide information on where and when to perform the behavior (HE)      | All effect sizes are adjusted for baseline behavior                                                 | All effect sizes are adjusted for baseline behavior                                                 |
|                                                           |                   |                         |            | <b>Duration of the intervention:</b><br>6 months<br>(26 weeks)              |                                                                         |                                                                                                     |                                                                                                     |

|                                                           |                   |                         |            | <b>Follow-up:</b><br>6 months<br>(26 weeks)     |                                                             |                                                                           |                                                                            |
|-----------------------------------------------------------|-------------------|-------------------------|------------|-------------------------------------------------|-------------------------------------------------------------|---------------------------------------------------------------------------|----------------------------------------------------------------------------|
| Demark-Wahnefried et al. <sup>12</sup>                    | Healthy eating    | Social cognitive theory | Sequential | <b>Dose:</b><br>6 computer-tailored newsletters | Provide information on consequences of behaviour in general | <b>Diet:</b><br>F&V intake<br>0.22 [0.05; 0.39]                           | <b>Diet:</b><br>F&V intake<br>0.11 [-0.07; 0.29]                           |
| Christy et al. <sup>13</sup>                              | Physical activity | Trans-theoretical model |            | 6 update cards                                  | (HE + PA)                                                   | Fat intake<br>-0.41 [-0.58; -0.24]                                        | Fat intake<br>-0.25 [-0.43; -0.07]                                         |
| Mosher et al. <sup>14</sup>                               |                   |                         |            | 1 summary newsletter                            | Goal setting<br>(HE + PA)                                   | Diet quality<br>0.38 [0.21; 0.55]                                         | Diet quality<br>0.25 [0.07; 0.42]                                          |
| Ottenbacher et al. <sup>15</sup>                          |                   |                         |            | <b>Material:</b><br>Personalized workbook       | Barrier identification/<br>problem solving<br>(HE + PA)     | <b>Physical activity:</b><br>Moderate-to-vigorous PA<br>0.24 [0.08; 0.39] | <b>Physical activity:</b><br>Moderate-to-vigorous PA<br>0.07 [-0.11; 0.24] |
| <b>Protocol</b><br>Demark-Wahnefried et al. <sup>16</sup> |                   |                         |            | Pedometer                                       |                                                             | All effect sizes are adjusted for baseline behavior                       | All effect sizes are adjusted for baseline behavior                        |
|                                                           |                   |                         |            | Resistance band                                 | Provide feedback on performance<br>(HE + PA)                |                                                                           |                                                                            |
| Demark Wahnefried <sup>17</sup>                           |                   |                         |            | Dried fruit samples                             |                                                             |                                                                           |                                                                            |
|                                                           |                   |                         |            | Fat gram counter booklet                        | Provide rewards (praises and encouragements)                |                                                                           |                                                                            |
|                                                           |                   |                         |            | Butter substitute samples                       | ) contingent on successful behaviors<br>(HE + PA)           |                                                                           |                                                                            |
|                                                           |                   |                         |            | <b>Provider:</b><br>Computer-                   |                                                             |                                                                           |                                                                            |

|                                        |                                         |                         |              |                                                                 |                                                                            |                                                                                                    |                |
|----------------------------------------|-----------------------------------------|-------------------------|--------------|-----------------------------------------------------------------|----------------------------------------------------------------------------|----------------------------------------------------------------------------------------------------|----------------|
|                                        |                                         |                         |              | assisted                                                        |                                                                            |                                                                                                    |                |
|                                        |                                         |                         |              | <b>Delivery:</b><br>Mail                                        | Prompt self-monitoring of behaviour (HE + PA)                              |                                                                                                    |                |
|                                        |                                         |                         |              | <b>Duration of the intervention:</b><br>10 months (43 weeks)    | Prompt review of behavioral goals (HE + PA)                                |                                                                                                    |                |
|                                        |                                         |                         |              | <b>Follow-up:</b><br>12 months (52 weeks)                       | Set graded tasks (HE + PA)                                                 |                                                                                                    |                |
|                                        |                                         |                         |              |                                                                 | Environmental restructuring (HE + PA)                                      |                                                                                                    |                |
|                                        |                                         |                         |              |                                                                 | Testimonials <sup>g</sup> (tailored on age, race, and cancer coping style) |                                                                                                    |                |
| Demark-Wahnefried et al. <sup>18</sup> | Healthy eating<br><br>Physical activity | Social cognitive theory | Simultaneous | <b>Dose:</b><br>14 counseling sessions (10-30 min/session)      | Provide information on consequences of behavior in general (HE + PA)       | <b>Healthy Eating</b><br>F&V intake<br>0.64 [0.10; 1.17]<br><br>Fat intake<br>-1.35 [-1.93; -0.76] | N/A<br><br>N/A |
|                                        |                                         |                         |              | <b>Material:</b><br>Participant workbook (detailed instruction) | Provide instruction on how to perform the behavior                         | Total energy intake<br>0.04 [-0.49; 0.56]                                                          | N/A            |

|                                        |                                  |                        |              |                                                                              |                                                                                        |                                                      |
|----------------------------------------|----------------------------------|------------------------|--------------|------------------------------------------------------------------------------|----------------------------------------------------------------------------------------|------------------------------------------------------|
|                                        |                                  |                        |              | (HE + PA)                                                                    | <b>Physical activity:</b><br>PA assessed with an accelerometer:<br>-0.16 [-0.68; 0.37] | N/A                                                  |
|                                        | Videotape (detailed instruction) |                        |              | Prompt self-monitoring of behavior                                           |                                                                                        |                                                      |
|                                        | Heart rate monitor               |                        |              | (HE + PA)                                                                    | PA assessed with a questionnaire:<br>0.08 [-0.45; 0.61]                                | N/A                                                  |
|                                        | Exercise ball                    |                        |              | Goal-setting (HE + PA)                                                       |                                                                                        |                                                      |
|                                        | Resistance bands                 |                        |              | Model/Demonstrate the behavior (PA)                                          |                                                                                        |                                                      |
|                                        | Water-fillable ankle weight      |                        |              |                                                                              |                                                                                        |                                                      |
|                                        |                                  |                        |              | <b>Provider:</b><br>Counselor with dual degrees in Nutrition and Kinesiology |                                                                                        |                                                      |
|                                        |                                  |                        |              | <b>Delivery:</b><br>Phone<br>Mail                                            |                                                                                        |                                                      |
|                                        |                                  |                        |              | <b>Duration of the intervention:</b><br>6 months<br>(26 weeks)               |                                                                                        |                                                      |
| Demark-Wahnefried et al. <sup>19</sup> | Healthy eating                   | Interdependence theory | Simultaneous | <b>Dose:</b><br>6 newsletters-tailored                                       | Goal-setting (HE + PA)                                                                 | <b>Healthy Eating:</b><br>Total energy intake<br>N/A |

|                   |                                                                                        |                                                                 |                                                                                           |                                                                                                             |     |
|-------------------|----------------------------------------------------------------------------------------|-----------------------------------------------------------------|-------------------------------------------------------------------------------------------|-------------------------------------------------------------------------------------------------------------|-----|
| Physical activity | Social cognitive theory<br><br>Theory of communal coping<br><br>Transtheoretical Model | feedback                                                        | Set graded task (HE + PA)                                                                 | -0.07 [-0.70; 0.56]                                                                                         |     |
|                   |                                                                                        | <b>Material:</b><br>Tailored workbook                           | Prompt self-monitoring of behavior (HE + PA)                                              | Diet quality<br>0.33 [-0.33; 0.96]                                                                          | N/A |
|                   |                                                                                        | Logbooks and reference manuals or website (for self-monitoring) | Barrier identification/ Problem solving (HE + PA)                                         | <b>Physical activity:</b><br>Moderate to vigorous PA (assessed with an accelerometer)<br>0.42 [-0.21; 1.06] | N/A |
|                   |                                                                                        | iPods and shoe chips (for self-monitoring)                      | Prompt rewards contingent on effort or progress towards behavior (HE + PA)                | PA energy expenditure (assessed with a questionnaire)<br>0.55 [-0.09; 1.18]                                 | N/A |
|                   |                                                                                        | Portion control tableware                                       |                                                                                           |                                                                                                             |     |
|                   |                                                                                        | <b>Provider:</b><br>Computer-assisted                           |                                                                                           |                                                                                                             |     |
|                   |                                                                                        | <b>Delivery:</b><br>Mail                                        | Action planning (HE + PA)                                                                 |                                                                                                             |     |
|                   |                                                                                        | <b>Duration of the intervention:</b><br>12 months (13 weeks)    | Feedback on behavioral performance (HE+ PA)<br><br>Facilitate social comparison (HE + PA) |                                                                                                             |     |

---

|                             |                                         |                         |              |                                                                                                                                              |                                                                                                                                                                  |                                                                                                                                                                                                                                                          |                           |
|-----------------------------|-----------------------------------------|-------------------------|--------------|----------------------------------------------------------------------------------------------------------------------------------------------|------------------------------------------------------------------------------------------------------------------------------------------------------------------|----------------------------------------------------------------------------------------------------------------------------------------------------------------------------------------------------------------------------------------------------------|---------------------------|
|                             |                                         |                         |              |                                                                                                                                              | Relapse prevention/<br>Coping planning<br>(HE + PA)                                                                                                              |                                                                                                                                                                                                                                                          |                           |
|                             |                                         |                         |              |                                                                                                                                              | Provide normative information about others' behavior<br>(HE + PA)                                                                                                |                                                                                                                                                                                                                                                          |                           |
|                             |                                         |                         |              |                                                                                                                                              | General communication skills training                                                                                                                            |                                                                                                                                                                                                                                                          |                           |
| Djuric et al. <sup>20</sup> | Healthy eating<br><br>Physical activity | Social cognitive theory | Simultaneous | <b>Dose:</b><br>24 counselling sessions<br><br>12 group meetings (monthly basis)<br><br>One-on-one meeting<br><br>52 Weight Watcher sessions | Goal-setting (weight loss)<br><br>Goal-setting (HE+ PA)<br><br>Prompt rewards contingent on effort or progress towards behavior (HE + PA)<br><br>Self-monitoring | <b>Healthy Eating</b><br>Fat intake<br>-2.29 [-3.52; -1.07]<br><br>Total energy intake<br>-1.58 [-2.65; -0.51]<br><br><b>Physical activity:</b><br>PA ( $p > 0.05$ )<br><i>Assessed, but data required for effect size calculation were not reported</i> | N/A<br><br>N/A<br><br>N/A |

---

|                             |                                         |                                                        |              |                                                                                                                                                                                                                                                                    |                                                                                                                                                                                                                                                                                                                                     |                                                                                                    |                |
|-----------------------------|-----------------------------------------|--------------------------------------------------------|--------------|--------------------------------------------------------------------------------------------------------------------------------------------------------------------------------------------------------------------------------------------------------------------|-------------------------------------------------------------------------------------------------------------------------------------------------------------------------------------------------------------------------------------------------------------------------------------------------------------------------------------|----------------------------------------------------------------------------------------------------|----------------|
|                             |                                         |                                                        |              | <b>Material:</b><br>12 Monthly<br>packet of written<br>information<br><br>Pedometer<br><br><b>Provider:</b><br>Dietician<br><br><b>Delivery:</b><br>Phone<br>In-person<br>Mail<br><br><b>Duration of the<br/>         intervention:</b><br>12 months<br>(52 weeks) | of outcome<br>(body weight)<br><br>Self-monitoring<br>of behaviors<br>(HE+ PA)<br><br>Prompt review<br>of behavioral<br>goals<br>(HE + PA)<br><br>Provide<br>feedback on<br>behavioral<br>performance<br>(HE + PA)<br><br>Environmental<br>restructuring<br>(HE + PA)<br><br>Relapse<br>prevention/<br>coping planning<br>(HE + PA) |                                                                                                    |                |
| Djuric et al. <sup>21</sup> | Healthy eating<br><br>Physical activity | None specified<br><br>Based on MI and social cognitive | Simultaneous | <b>Dose:</b><br>19 counselling sessions<br><br>Educational materials                                                                                                                                                                                               | Motivational interviewing (HE + PA)<br><br>Provide information on consequences                                                                                                                                                                                                                                                      | <b>Healthy Eating:</b><br>Fat intake<br>-0.73 [-1.47; 0.02]<br><br>F&V intake<br>1.66 [0.81; 2.52] | N/A<br><br>N/A |

|                              |                                |                |              |                                                                                                                                                                                                                                                                                                                                 |                                                                                                                                                                                                                          |                                                                                                                       |     |
|------------------------------|--------------------------------|----------------|--------------|---------------------------------------------------------------------------------------------------------------------------------------------------------------------------------------------------------------------------------------------------------------------------------------------------------------------------------|--------------------------------------------------------------------------------------------------------------------------------------------------------------------------------------------------------------------------|-----------------------------------------------------------------------------------------------------------------------|-----|
|                              | theory principles              |                |              | <b>Material:</b><br>Pedometer<br><br>Daily Diet and PA log<br><br>Fast tracker<br><br>Food booklet<br><br>Fat gram counter/food exchange list book<br><br>Example of menus<br><br><b>Provider:</b><br>Dietician<br><br><b>Delivery:</b><br>Phone<br>Mail<br><br><b>Duration of the intervention:</b><br>12 months<br>(52 weeks) | of behavior in general<br>(HE + PA)<br><br>Goal-setting<br>(HE + PA)<br><br>Provide feedback on behavioral performance<br>(HE + PA)<br><br>Prompt rewards contingent on effort or progress towards behavior<br>(HE + PA) | <b>Physical activity:</b><br>Time spent walking and performing mild, moderate, and strenuous PA<br>0.54 [-0.20; 1.28] | N/A |
| Goodwin et al. <sup>22</sup> | Healthy eating<br><br>Physical | None specified | Simultaneous | <b>Dose:</b><br>19 counselling sessions<br>(30-60                                                                                                                                                                                                                                                                               | Provide information on consequences of behaviour in                                                                                                                                                                      | <b>Healthy Eating:</b><br>Total energy intake<br><i>Assessed, and data</i>                                            | N/A |



|          |                                                                      |                                                         |                                                                                                                                                               |     |
|----------|----------------------------------------------------------------------|---------------------------------------------------------|---------------------------------------------------------------------------------------------------------------------------------------------------------------|-----|
| activity | min/session)                                                         | general<br>(HE + PA)                                    | <i>reported at baseline and 12 months. However, data required for effect size calculation at 24 months were not reported</i>                                  |     |
|          | <b>Additional material:</b><br>Workbook                              | Goal-setting<br>(weight loss)                           |                                                                                                                                                               |     |
|          | Written information<br>(from Canadian Cancer Society, Health Canada) | Goal-setting<br>(HE + PA)                               |                                                                                                                                                               |     |
|          | 2-year subscription to the Canadian Health Magazine                  | Relapse prevention/<br>Coping planning<br>(HE + PA)     | Fat intake<br><i>Assessed, and data reported at baseline and 12 months. However, data required for effect size calculation at 24 months were not reported</i> | N/A |
|          | <b>Provider:</b><br>Lifestyle coaches                                | Time management<br>(HE+ PA)                             |                                                                                                                                                               |     |
|          | <b>Delivery:</b><br>Phone<br>Mail                                    | Barrier identification/<br>Problem solving<br>(HE + PA) | F&V intake<br><i>Assessed, and data reported at baseline and 12 months. However, data required for effect size calculation at 24 months were not reported</i> | N/A |
|          | <b>Duration of the intervention:</b><br>24 months<br>(104 weeks)     | Provide feedback on performance<br>(HE + PA)            |                                                                                                                                                               |     |
|          |                                                                      | Stress management/<br>Emotional                         | <b>Physical activity:</b><br>Moderate-to-                                                                                                                     | N/A |

|                               |                                         |                |                                 |                                                                                                                                                                                                                                                                 |                                                                                                                                                                                                                         |                                                                                                                                                                                                                            |                                      |
|-------------------------------|-----------------------------------------|----------------|---------------------------------|-----------------------------------------------------------------------------------------------------------------------------------------------------------------------------------------------------------------------------------------------------------------|-------------------------------------------------------------------------------------------------------------------------------------------------------------------------------------------------------------------------|----------------------------------------------------------------------------------------------------------------------------------------------------------------------------------------------------------------------------|--------------------------------------|
|                               |                                         |                |                                 |                                                                                                                                                                                                                                                                 | control training                                                                                                                                                                                                        | vigorous PA<br>( $\geq 150$ min/wk) <sup>b</sup><br>0.09 [-0.22, 0,40]                                                                                                                                                     |                                      |
|                               |                                         |                |                                 |                                                                                                                                                                                                                                                                 |                                                                                                                                                                                                                         | Higher levels of walking behavior (min/wk) in the MHBC intervention condition; data reported as median [Q1, Q3] ( $p < 0.05$ )                                                                                             | N/A                                  |
| Greenlee et al. <sup>23</sup> | Healthy eating<br><br>Physical activity | None specified | Simultaneous<br><i>-tapered</i> | <b>Dose:</b><br>Curves Weight Management Program (memberships to Curves fitness center; including 3 one-on-one training sessions and Curves diet plan)<br><br>6 nutrition group sessions (1 hour/session)<br><br>6 counselling sessions<br><br><b>Material:</b> | Provide membership to Curves® fitness center <sup>g</sup><br><br>Goal-setting (HE + PA)<br><br>Prompt practice (HE + PA)<br><br>Model/<br>Demonstrate the behavior (HE)<br><br>Set-graded task-(PA)<br><br>Goal-setting | <b>Healthy Eating</b><br>F&V intake<br>0.14 [-0.49, 0,78]<br><br>Fat intake<br>0.16 [-0.47, 0,80]<br><br>Total energy intake<br>-0.30 [-0.93, 0,34]<br><br><b>Physical activity</b><br>Sport/exercise<br>1.72 [0.97, 2,47] | N/A<br><br>N/A<br><br>N/A<br><br>N/A |

|                                                   |                      |                        |              |                                                                    |                                                                        |                                                                |                                                                 |
|---------------------------------------------------|----------------------|------------------------|--------------|--------------------------------------------------------------------|------------------------------------------------------------------------|----------------------------------------------------------------|-----------------------------------------------------------------|
|                                                   |                      |                        |              | Curves book<br>(weight loss)                                       |                                                                        |                                                                |                                                                 |
|                                                   |                      |                        |              | DVDs, manuals,<br>and recipe book                                  | Provide<br>instruction on<br>how to perform<br>the behavior<br>(HE)    |                                                                |                                                                 |
|                                                   |                      |                        |              | Heart rate<br>monitor                                              |                                                                        |                                                                |                                                                 |
|                                                   |                      |                        |              | <b>Provider:</b><br>Curves staff                                   | Barriers<br>identification/<br>Problem<br>solving<br>(HE + PA)         |                                                                |                                                                 |
|                                                   |                      |                        |              | <b>Delivery:</b><br>In person<br>Phone                             |                                                                        |                                                                |                                                                 |
|                                                   |                      |                        |              | <b>Duration of the<br/>intervention:</b><br>6 months<br>(26 weeks) |                                                                        |                                                                |                                                                 |
| Hawkes et<br>al. <sup>24</sup>                    | Alcohol              | Acceptanc<br>e         | Simultaneous | <b>Dose:</b><br>11 counselling<br>sessions                         | Provide<br>information on<br>consequences<br>of behavior in<br>general | <b>Healthy Eating</b><br>Vegetable intake<br>0.32 [0.11, 0.53] | <b>Healthy Eating</b><br>Vegetable intake<br>0.16 [-0.06, 0.38] |
| <b>Protocol</b><br>Hawkes et<br>al. <sup>25</sup> | Healthy<br>eating    | commitme<br>nt therapy |              | 10 postcard<br>prompts                                             | Goal-setting of<br>behaviors (PA)                                      | Fruit intake<br>0.17 [-0.04, 0.44]                             | Fruit intake<br>0.00 [-0.22, 0.22]                              |
|                                                   | Physical<br>activity |                        |              | 4 study<br>newsletters                                             |                                                                        | F&V intake<br>0.25 [0.13, 0.37]                                | F&V intake<br>0.08 [-0.10, 0.26]                                |
|                                                   | Smoking              |                        |              | <b>Material:</b><br>Participant<br>handbook                        | Barrier<br>identification/<br>problem<br>solving<br>(HE + PA)          | Fat intake<br>-0.31 [-0.52, -0.09]                             | Fat intake<br>-0.25 [-0.47, -0.03]                              |

|                                |                      |                           |              |                                                                    |                                                                                          |                                                                                         |                                                                                         |
|--------------------------------|----------------------|---------------------------|--------------|--------------------------------------------------------------------|------------------------------------------------------------------------------------------|-----------------------------------------------------------------------------------------|-----------------------------------------------------------------------------------------|
|                                |                      |                           |              | Pedometer                                                          |                                                                                          | <b>Physical activity:</b><br>Moderate to vigorous PA <sup>e</sup><br>0.11 [-0.10, 0.32] | <b>Physical activity:</b><br>Moderate to vigorous PA <sup>e</sup><br>0.20 [-0.02, 0.42] |
|                                |                      |                           |              | <b>Provider:</b><br>Health coaches                                 | Action planning<br>(HE + PA)                                                             |                                                                                         |                                                                                         |
|                                |                      |                           |              | <b>Delivery:</b><br>Phone<br>Mail                                  | Prompt self-<br>monitoring of<br>behaviors (PA)                                          | All effect sizes are<br>adjusted for<br>baseline behavior                               | All effect sizes are<br>adjusted for<br>baseline behavior                               |
|                                |                      |                           |              | <b>Duration of the<br/>intervention:</b><br>6 months (26<br>weeks) | Use of follow-<br>up prompts<br>(HE + PA)                                                |                                                                                         |                                                                                         |
|                                |                      |                           |              | <b>Follow-up:</b><br>6 months<br>(26 weeks)                        | Motivational<br>interviewing<br>(HE + PA)                                                |                                                                                         |                                                                                         |
|                                |                      |                           |              |                                                                    | Stress<br>management/<br>emotional<br>control training                                   |                                                                                         |                                                                                         |
|                                |                      |                           |              |                                                                    | Cancer-related<br>symptoms<br>management                                                 |                                                                                         |                                                                                         |
| Hébert et<br>al. <sup>26</sup> | Healthy<br>eating    | Mind-<br>fulness<br>Based | Simultaneous | <b>Dose:</b><br>12 group<br>sessions<br>(2.5<br>hours/session)     | Goals-setting<br>(HE + PA)                                                               | <b>Healthy Eating</b><br>Fruit intake <sup>f</sup><br>0.35 [-0.23, 0.93]                | N/A                                                                                     |
|                                | Physical<br>activity | Stress<br>Reduction       |              | 3 booster group<br>sessions                                        | Prompt practice<br>(daily<br>homework<br>assignment;<br>cooking, PA,<br>stress reduction | Vegetable intake <sup>f</sup><br>0.19 [-0.38, 0.77]                                     | N/A                                                                                     |
|                                |                      |                           |              |                                                                    |                                                                                          | F&V intake<br>0.27 [-0.22, 0.76]                                                        | N/A                                                                                     |

|                           |                   |                |              |                                                                |                                                              |                                                                                                          |     |
|---------------------------|-------------------|----------------|--------------|----------------------------------------------------------------|--------------------------------------------------------------|----------------------------------------------------------------------------------------------------------|-----|
|                           |                   |                |              | 3 booster phone calls                                          | activities)                                                  | Total energy intake <sup>f*</sup>                                                                        | N/A |
|                           |                   |                |              | <b>Provider:</b><br>Not specified                              | Provide instruction on how to perform the behavior (HE + PA) | -0.12 [-0.70, 0.45]                                                                                      |     |
|                           |                   |                |              | <b>Delivery:</b><br>In person<br>Phone                         | Use of follow-up prompts (HE + PA)                           | Fat intake <sup>f*</sup><br>-0.52 [-1.11, 0.06]                                                          | N/A |
|                           |                   |                |              | <b>Duration of the intervention:</b><br>6 months<br>(26 weeks) | Stress management/<br>Emotional control training             | <b>Physical activity:</b><br>Total PA energy expenditure <sup>f</sup><br>0.13 [-0.44, 0.71]              | N/A |
|                           |                   |                |              |                                                                |                                                              | Moderate-to-vigorous PA energy expenditure <sup>f*</sup><br>0.01 [-0.57, 0.58]                           | N/A |
|                           |                   |                |              |                                                                |                                                              | *Significant time × group interaction effect; between-group difference change at 3 months ( $p < 0.05$ ) |     |
| Hung et al. <sup>27</sup> | Healthy eating    | None specified | Simultaneous | <b>Dose:</b><br>1 behavioral counseling session                | Goal setting (HE + PA)                                       | <b>Healthy Eating:</b><br>Total energy intake <sup>c</sup><br>-0.15 [-0.84, 0.55]                        | N/A |
|                           | Physical activity |                |              | 10 telephone sessions                                          | Provide instruction on how to perform the behavior           | <b>Physical activity:</b><br>Moderate PA <sup>c</sup>                                                    | N/A |

|                            |                   |                                          |              |                                      |                                                                   |                                                         |                                  |
|----------------------------|-------------------|------------------------------------------|--------------|--------------------------------------|-------------------------------------------------------------------|---------------------------------------------------------|----------------------------------|
|                            |                   |                                          |              |                                      | (HE + PA)                                                         | 0.27 [-0.44, 0.98]                                      |                                  |
|                            |                   |                                          |              | <b>Providers:</b>                    |                                                                   |                                                         |                                  |
|                            |                   |                                          |              | Dietician                            | Prompt review                                                     | Vigorous PA <sup>c</sup>                                | N/A                              |
|                            |                   |                                          |              | Exercise physiologist                | of behavioral goals                                               | 0.41 [-0.30, 1.12]                                      |                                  |
|                            |                   |                                          |              |                                      | (HE + PA)                                                         | Walking PA <sup>c</sup>                                 | N/A                              |
|                            |                   |                                          |              | <b>Delivery:</b>                     |                                                                   |                                                         |                                  |
|                            |                   |                                          |              | In person                            | Provide feedback on behavioral performance                        | *Adjusted for age, gender, diagnosis, LOS, PG-SGA score |                                  |
|                            |                   |                                          |              | Phone                                |                                                                   |                                                         |                                  |
|                            |                   |                                          |              | <b>Duration of the intervention:</b> | (HE + PA)                                                         |                                                         |                                  |
|                            |                   |                                          |              | 12 weeks                             |                                                                   |                                                         |                                  |
| James et al. <sup>28</sup> | Healthy eating    | Social cognitive theory                  | Simultaneous | <b>Dose:</b>                         | Provide information on consequences of behavior in general        | <b>Healthy Eating:</b>                                  | <b>Healthy Eating:</b>           |
|                            |                   |                                          |              | 4 weekly sessions                    | (HE + PA)                                                         | Fruit intake <sup>c</sup>                               | Fruit intake <sup>c</sup>        |
|                            |                   |                                          |              | 2 fortnightly sessions               |                                                                   | 0.28 [-0.10, 0.66]                                      | 0.36 [-0.03, 0.75]               |
| <b>Protocol</b>            | Physical activity | Chronic disease self-management approach |              | (60 min/session)                     |                                                                   | Vegetable intake <sup>c</sup>                           | Vegetable intake <sup>c</sup>    |
| James et al. <sup>29</sup> |                   |                                          |              | <b>Material:</b>                     | Provide information on consequences of behavior to the individual | F&V intake                                              | F&V intake                       |
|                            |                   |                                          |              | Elastic tubing-Gymstick™             | (HE + PA)                                                         | 0.24 [-0.07, 0.55]                                      | 0.43 [0.10, 0.76]                |
|                            |                   |                                          |              | Pedimeter                            |                                                                   | Fat intake <sup>c</sup>                                 | Fat intake <sup>c</sup>          |
|                            |                   |                                          |              | Steps count diary                    |                                                                   | -0.17 [-0.55, 0.21]                                     | -0.22 [-0.60, 0.16]              |
|                            |                   |                                          |              | Written resources                    | Prompt self-monitoring of behavior (PA)                           | Total energy intake <sup>c</sup>                        | Total energy intake <sup>c</sup> |
|                            |                   |                                          |              | <b>Provider:</b>                     |                                                                   | -0.08 [-0.46, 0.30]                                     | -0.13 [-0.51, 0.25]              |
|                            |                   |                                          |              | Exercise specialist                  | Goal setting (PA)                                                 | <b>Physical activity:</b>                               | <b>Physical activity:</b>        |
|                            |                   |                                          |              |                                      |                                                                   | Daily steps <sup>c</sup>                                | Daily steps <sup>c</sup>         |
|                            |                   |                                          |              |                                      |                                                                   | 0.59 [0.21, 0.97]                                       | 0.30 [-0.08, 0.68]               |

---

|                                                     |                                                                                                    |                                                                              |                                                                              |
|-----------------------------------------------------|----------------------------------------------------------------------------------------------------|------------------------------------------------------------------------------|------------------------------------------------------------------------------|
| Dietician                                           |                                                                                                    |                                                                              |                                                                              |
| <b>Delivery:</b><br>In person                       | Goal setting<br>(outcome)                                                                          | Moderate-to-<br>vigorous PA <sup>c</sup><br>0.27 [-0.44, 0.98]               | Moderate-to-<br>vigorous PA <sup>c</sup><br>-0.13 [-0.51, 0.25]              |
| <b>Duration of the<br/>intervention:</b><br>8 weeks | Prompt self-<br>monitoring<br>(PA)                                                                 | Resistance<br>training <sup>c</sup><br>0.23 [-0.15, 0.61]                    | Resistance<br>training <sup>c</sup><br>0.16 [-0.22, 0.54]                    |
|                                                     | Barrier<br>identification/pr<br>oblem solving<br>(PA)                                              | All effect sizes are<br>adjusted for the<br>baseline value of<br>the outcome | All effect sizes are<br>adjusted for the<br>baseline value of<br>the outcome |
|                                                     | Provide<br>instruction on<br>how to perform<br>the behavior<br>(HE + PA)                           |                                                                              |                                                                              |
|                                                     | Prompt practice<br>(PA)<br>Model or<br>demonstrate the<br>behavior (role<br>modeling)<br>(HE + PA) |                                                                              |                                                                              |
|                                                     | Plan social<br>support/social<br>change<br>(HE + PA)                                               |                                                                              |                                                                              |
|                                                     | Chronic disease                                                                                    |                                                                              |                                                                              |

---

---

|                          |                                         |                         |              |                                                                                                                                                                                                                                                                                          |                                                                                                                                                                                                                                                                                            |                                                                                                                                                                                                                                                                                           |                |
|--------------------------|-----------------------------------------|-------------------------|--------------|------------------------------------------------------------------------------------------------------------------------------------------------------------------------------------------------------------------------------------------------------------------------------------------|--------------------------------------------------------------------------------------------------------------------------------------------------------------------------------------------------------------------------------------------------------------------------------------------|-------------------------------------------------------------------------------------------------------------------------------------------------------------------------------------------------------------------------------------------------------------------------------------------|----------------|
|                          |                                         |                         |              |                                                                                                                                                                                                                                                                                          | self-management techniques <sup>g</sup><br>(building self-efficacy, motivation, action plans, role modeling)                                                                                                                                                                               |                                                                                                                                                                                                                                                                                           |                |
| Kim et al. <sup>30</sup> | Healthy eating<br><br>Physical activity | Trans-theoretical Model | Simultaneous | <b>Dose:</b><br>12 counseling sessions<br>(30 min/session)<br><br><b>Material:</b><br>Heart rate monitor<br><br>Workbook-stage-match information<br><br><b>Provider:</b><br>Nurse<br><br><b>Delivery:</b><br>Phone<br><br><b>Duration of the intervention:</b><br>3 months<br>(12 weeks) | <u>Pre-contemplation</u><br><br>Provide information on consequences of behavior in <i>general</i> (HE + PA)<br><br><u>Contemplation</u><br><br>Provide information on consequences of behavior to the <i>individual</i> (HE + PA)<br><br>Barrier identification/ Problem solving (HE + PA) | <b>Healthy Eating</b><br>Diet quality**<br>0.92 [0.30, 1.53]<br><br><b>Physical activity:</b><br>Moderate-to-vigorous PA*<br>0.63 [0.03, 1.24]<br><br>*A non significant time × group interaction ( $p = 0.09$ ) was reported by the authors<br><br>**Lower score indicate better quality | N/A<br><br>N/A |

---



---

Prompt use of  
imagery  
(HE + PA)

Preparation

Provide  
instruction on  
how to perform  
the behavior  
(HE + PA)

Prompt self-  
monitoring  
(HE + PA)

Provide  
information on  
consequences  
of behavior to  
the *individual*  
(HE + PA)

Action and  
maintenance

Provide  
feedback on  
performance  
(HE + PA)

Prompt rewards  
contingent on

---

---

|                          |                                         |                         |              |                                                                                                  |                                                                                                                                       |                                                                                                                                          |                            |
|--------------------------|-----------------------------------------|-------------------------|--------------|--------------------------------------------------------------------------------------------------|---------------------------------------------------------------------------------------------------------------------------------------|------------------------------------------------------------------------------------------------------------------------------------------|----------------------------|
|                          |                                         |                         |              |                                                                                                  | effort or progress towards behavior (HE + PA)                                                                                         |                                                                                                                                          |                            |
|                          |                                         |                         |              |                                                                                                  | Plan social support/<br>Social change (HE + PA)                                                                                       |                                                                                                                                          |                            |
|                          |                                         |                         |              |                                                                                                  | Behavioral substitution: substitution of exercise for sedentary behavior and a balanced diet for one that was unbalanced <sup>g</sup> |                                                                                                                                          |                            |
|                          |                                         |                         |              |                                                                                                  | Environmental restructuring (HE + PA)                                                                                                 |                                                                                                                                          |                            |
| Lee et al. <sup>31</sup> | Healthy eating<br><br>Physical activity | Trans-theoretical model | Simultaneous | <b>Dose:</b><br>Web-based self-management exercise and diet intervention (WSEDI)<br><br>Tailored | <u>Pre-contemplation</u><br><br>Provide information on consequences of behavior in <i>general</i>                                     | <b>Healthy Eating:</b><br>F&V intake ( $\geq 5$ servings/d) <sup>b*</sup><br>0.52 [-0.07, 1.12]<br><br>Fat intake<br>-0.18 [-0.70, 0.34] | N/A<br><br><br><br><br>N/A |

---

---

|                                                                |                                                                                    |                                                                                                             |     |
|----------------------------------------------------------------|------------------------------------------------------------------------------------|-------------------------------------------------------------------------------------------------------------|-----|
| feedback                                                       | (HE + PA)                                                                          | Diet quality<br>0.92 [0.38, 1.47]                                                                           | N/A |
| Encourage to use the WSEDI twice a week                        | <u>Contemplation</u>                                                               |                                                                                                             |     |
| <b>Provider:</b><br>Self-management                            | Provide information on consequences of behavior to the <i>individual</i> (HE + PA) | <b>Physical activity:</b><br>Moderate-to-vigorous PA ( $\geq 150$ min/d) <sup>b*</sup><br>0.67 [0.08, 1.27] | N/A |
| <b>Delivery:</b><br>Online<br>SMS                              | Barrier identification/<br>Problem solving (HE + PA)                               | *When adjusted for baseline behavior, the reported <i>p</i> -value was < 0.001.                             |     |
| <b>Duration of the intervention:</b><br>3 months<br>(12 weeks) | Prompt use of imagery (HE + PA)                                                    |                                                                                                             |     |
|                                                                | <u>Preparation</u>                                                                 |                                                                                                             |     |
|                                                                | Action planning (HE + PA)                                                          |                                                                                                             |     |
|                                                                | Goal-setting (HE + PA)                                                             |                                                                                                             |     |
|                                                                | Provide instruction on how to perform the behavior                                 |                                                                                                             |     |

---

---

(HE + PA)

Prompt self-  
monitoring  
(HE + PA)

Provide  
information on  
consequences  
of behavior (HE  
+ PA) to the  
*individual*

Provide  
feedback on  
performance  
(HE + PA)

Action and  
maintenance

Goal-setting  
(HE + PA)

Action planning  
(HE + PA)

Provide  
feedback on  
performance  
(HE + PA)

Prompt rewards

---

---

|                                        |                   |                         |              |                                                    |                                                                                                                                       |                                                          |     |
|----------------------------------------|-------------------|-------------------------|--------------|----------------------------------------------------|---------------------------------------------------------------------------------------------------------------------------------------|----------------------------------------------------------|-----|
|                                        |                   |                         |              |                                                    | contingent on effort or progress towards behavior (HE + PA)                                                                           |                                                          |     |
|                                        |                   |                         |              |                                                    | Plan social support/<br>Social change (HE + PA)                                                                                       |                                                          |     |
|                                        |                   |                         |              |                                                    | Behavioral substitution: substitution of exercise for sedentary behavior and a balanced diet for one that was unbalanced <sup>g</sup> |                                                          |     |
|                                        |                   |                         |              |                                                    | Environmental restructuring (HE + PA)                                                                                                 |                                                          |     |
| Morey et al. <sup>32</sup>             | Healthy eating    | Social cognitive Theory | Simultaneous | <b>Dose:</b><br>15 counseling sessions (15-30 min) | Provide information on consequences of behavior to the individuals (HE + PA)                                                          | <b>Healthy Eating</b><br>F&V intake<br>0.50 [0.34, 0.65] | N/A |
| Demark-Wahnefried et al. <sup>33</sup> | Physical activity | Trans-theoretical model |              | 8 postcard prompts                                 |                                                                                                                                       | Fat intake (saturated)<br>-0.33 [-0.49, -0.18]           | N/A |

---

| <b>Protocol</b>                      |                                                             |                                                                               |                                                                           |     |
|--------------------------------------|-------------------------------------------------------------|-------------------------------------------------------------------------------|---------------------------------------------------------------------------|-----|
| Snyder et al. <sup>34</sup>          | 4 study newsletters                                         | Goal-setting (HE + PA)                                                        | Diet quality<br>0.35 [0.19, 0.50]                                         | N/A |
|                                      | <b>Materials:</b><br>Personalized workbook                  | Barrier identification/<br>problem solving<br>(HE + PA)                       | <b>Physical activity:</b><br>Moderate-to-vigorous PA<br>0.24 [0.08, 0.39] | N/A |
|                                      | Pedometer                                                   |                                                                               |                                                                           |     |
|                                      | 3 exercise bands                                            | Prompt self-monitoring of behavior<br>(HE + PA)                               | Frequency of strength training exercise <sup>c</sup><br>0.41 [0.25, 0.57] | N/A |
|                                      | 1 poster depicting 6 lower-body strength training exercises | Provide feedback on performance<br>(HE + PA)                                  | Frequency of endurance exercise <sup>c</sup><br>0.23 [0.07, 0.39]         | N/A |
|                                      | Table guide to food portioning                              | Set graded tasks<br>(HE + PA)                                                 | All effect sizes are adjusted for baseline behavior                       |     |
|                                      | Fat gram booklet                                            |                                                                               |                                                                           |     |
|                                      | <b>Provider:</b><br>Health Counselor                        | Provide rewards-reinforcements contingent on successful behavior<br>(HE + PA) |                                                                           |     |
| <b>Delivery:</b><br>Phone<br>Mail    |                                                             |                                                                               |                                                                           |     |
| <b>Duration of the intervention:</b> | Model/<br>demonstrate the behavior                          |                                                                               |                                                                           |     |

|                                          |                      |                   |              |                                                                                              |                                                                          |                                                                                                                                                                  |     |
|------------------------------------------|----------------------|-------------------|--------------|----------------------------------------------------------------------------------------------|--------------------------------------------------------------------------|------------------------------------------------------------------------------------------------------------------------------------------------------------------|-----|
|                                          |                      |                   |              | 12 months<br>(52 weeks)                                                                      | (HE + PA)                                                                |                                                                                                                                                                  |     |
|                                          |                      |                   |              | <b>Follow-up:</b><br>12 months<br>(52 weeks)                                                 | Environmental<br>restructuring<br>(HE + PA)                              |                                                                                                                                                                  |     |
| Moyer-<br>Mileur et<br>al. <sup>35</sup> | Healthy<br>eating    | None<br>specified | Simultaneous | <b>Dose:</b><br>5 clinical<br>appointments                                                   | Prompt self-<br>monitoring<br>(PA)                                       | <b>Health Eating</b><br>No difference in<br>total energy intake<br>( $p > 0.05$ )<br><i>Data required to<br/>calculate effect<br/>size were not<br/>reported</i> | N/A |
|                                          | Physical<br>activity |                   |              | <b>Materials:</b><br>Physical<br>Activity<br>Pyramid for<br>youth                            | Provide<br>feedback on<br>performance<br>(HE + PA)                       |                                                                                                                                                                  |     |
|                                          |                      |                   |              | US Department<br>of Agriculture<br>Food Guide<br>Pyramid;<br>Nutrition related<br>activities | Provide<br>instruction on<br>how to perform<br>the behavior<br>(HE + PA) | No difference in<br>F&V intake<br>( $p > 0.05$ )<br><i>Data required to<br/>calculate effect<br/>size were not<br/>reported</i>                                  | N/A |
|                                          |                      |                   |              | <b>Provider:</b><br>Dietician                                                                | Model/<br>Demonstrate<br>the behavior<br>(HE + PA)                       | No difference in in<br>fat intake ( $p >$<br>0.05)<br><i>Data required to<br/>calculate effect<br/>size were not<br/>reported</i>                                | N/A |
|                                          |                      |                   |              | <b>Delivery:</b><br>In-person or<br>phone                                                    |                                                                          |                                                                                                                                                                  |     |
|                                          |                      |                   |              | <b>Duration of the<br/>intervention:</b><br>12 months                                        |                                                                          | <b>Physical activity:</b><br>Higher levels of                                                                                                                    | N/A |

|                                       |                                         |                |              |                                                                                                                                                                                                                                        |                                                                                                                                                                                                    |                                                                                               |                                                                                                                                                                                                                                                                                                   |
|---------------------------------------|-----------------------------------------|----------------|--------------|----------------------------------------------------------------------------------------------------------------------------------------------------------------------------------------------------------------------------------------|----------------------------------------------------------------------------------------------------------------------------------------------------------------------------------------------------|-----------------------------------------------------------------------------------------------|---------------------------------------------------------------------------------------------------------------------------------------------------------------------------------------------------------------------------------------------------------------------------------------------------|
|                                       |                                         |                |              | (52 weeks)                                                                                                                                                                                                                             |                                                                                                                                                                                                    | total PA minutes were reported in the MHBC intervention condition ( $p = 0.05$ )              |                                                                                                                                                                                                                                                                                                   |
|                                       |                                         |                |              |                                                                                                                                                                                                                                        |                                                                                                                                                                                                    | Higher number of steps taken were recorded for the MHBC intervention condition ( $p = 0.06$ ) | N/A                                                                                                                                                                                                                                                                                               |
| O'Carrols Bantum et al. <sup>36</sup> | Healthy eating<br><br>Physical activity | None specified | Simultaneous | <b>Dose:</b><br>6 workshop sessions (30-35 webpages of didactic material)<br><br><b>Provider:</b><br>Peer facilitators (former cancer survivors)<br><br><b>Delivery:</b><br>Web<br><br><b>Duration of the intervention:</b><br>6 weeks | Goal-setting (HE + PA)<br><br>Barrier identification/ Problem solving (HE + PA)<br><br>Action planning (HE + PA)<br><br>Provide feedback on performance (HE + PA)<br><br>Facilitate social support | N/A<br><br>N/A<br><br>N/A<br><br>N/A                                                          | <b>Healthy Eating</b><br>F&V intake<br>SMD = 0.21*;<br>$p = 0.24^{**}$<br><br><b>Physical activity:</b><br>Moderate-to-vigorous LTPA<br>SMD = 0.29*;<br>$p = 0.45^{**}$<br><br>Vigorous LTPA<br>SMD = 0.36*;<br>$p = 0.01^{**}$<br><br>Moderate or Mild LTPA<br>SMD = 0.10;<br>$p \geq 0.28^{**}$ |



|                                                   |                      |                   |              | <b>Follow-up:</b><br>20 weeks                            | comparison<br>(HE + PA)                                                  |                                                                     | *Mean differences<br>from the predicted<br>model, adjusted<br>for age, race, sex,<br>marital status,<br>smoking status,<br>education, year<br>since diagnosis,<br>site of cancer<br>diagnosis, and<br>cancer stage. |
|---------------------------------------------------|----------------------|-------------------|--------------|----------------------------------------------------------|--------------------------------------------------------------------------|---------------------------------------------------------------------|---------------------------------------------------------------------------------------------------------------------------------------------------------------------------------------------------------------------|
|                                                   |                      |                   |              |                                                          | Prompt self-<br>monitoring<br>(HE + PA)                                  |                                                                     |                                                                                                                                                                                                                     |
|                                                   |                      |                   |              |                                                          | General<br>communication<br>skills training                              |                                                                     |                                                                                                                                                                                                                     |
|                                                   |                      |                   |              |                                                          | Stress<br>management/<br>Emotional<br>control training                   |                                                                     | **time × group<br>interaction                                                                                                                                                                                       |
| Ornish et<br>al. <sup>37</sup>                    | Healthy<br>eating    | None<br>specified | Simultaneous | <b>Dose:</b><br>52 group<br>meetings<br>(1 hour/meeting) | Provide<br>instruction on<br>how to perform<br>the behavior<br>(HE + PA) | <b>Healthy Eating</b><br>Fat intake<br>-0.34 [-0.77, 0.09]          | N/A                                                                                                                                                                                                                 |
| <b>Protocol</b><br>Ornish et<br>al. <sup>38</sup> | Physical<br>activity |                   |              | 21 counselling<br>sessions                               | Plan social<br>support/social<br>change<br>(HE + PA)                     | <b>Physical activity:</b><br>Total PA (min/wk)<br>0.51 [0.07, 0.94] | N/A                                                                                                                                                                                                                 |
|                                                   |                      |                   |              | <b>Provider:</b><br>Dietician                            |                                                                          | Total PA (d/wk)<br>0.64 [0.21, 1.08]                                | N/A                                                                                                                                                                                                                 |
|                                                   |                      |                   |              | <b>Delivery:</b><br>In person<br>Phone                   | Stress<br>management/<br>Emotional<br>control training                   |                                                                     |                                                                                                                                                                                                                     |
|                                                   |                      |                   |              | <b>Duration of the<br/>intervention:</b><br>12 months    |                                                                          |                                                                     |                                                                                                                                                                                                                     |

|                                    |                                         |                         |              | (52 weeks)                                                                                                                                                                                                                                                                                                                                          |                                                                                                                                                                                                                                                                                                                                             |                                                                                                                                          |                                                                                                                                         |
|------------------------------------|-----------------------------------------|-------------------------|--------------|-----------------------------------------------------------------------------------------------------------------------------------------------------------------------------------------------------------------------------------------------------------------------------------------------------------------------------------------------------|---------------------------------------------------------------------------------------------------------------------------------------------------------------------------------------------------------------------------------------------------------------------------------------------------------------------------------------------|------------------------------------------------------------------------------------------------------------------------------------------|-----------------------------------------------------------------------------------------------------------------------------------------|
| Von Gruenigen et al. <sup>39</sup> | Healthy eating<br><br>Physical activity | Social cognitive theory | Simultaneous | <b>Dose:</b><br>11 group sessions<br>(60 min/session)<br><br>3 Physician counseling sessions<br><br>11 Newsletters<br><br><b>Material:</b><br>Pedometer<br><br><b>Providers:</b><br>Researcher, dietician, psychologist<br><br><b>Delivery:</b><br>In-person<br>Mail<br>Phone<br><br><b>Duration of the intervention:</b><br>6 months<br>(26 weeks) | Provide information on consequences of behavior in general<br>(HE + PA)<br><br>Goal setting (body weight, HE, PA)<br><br>Provide feedback on performance<br>(HE + PA)<br><br>Prompt rewards contingent on effort or progress towards behavior (praise, encouragement)<br><br>Set graded task (PA)<br><br>Prompt practice (PA)<br><br>Stress | <b>Healthy Eating</b><br>Total energy intake<br>-0.20 [-0.89, 0.50]<br><br><b>Physical activity:</b><br>Total LTPA<br>0.64 [-0.07, 1.35] | <b>Healthy Eating</b><br>Total energy intake<br>-0.17 [-0.83, 0.50]<br><br><b>Physical activity:</b><br>Total LTPA<br>0.76 [0.07, 1.45] |

|                                          |                   |                               |                                                       | management/<br>Emotional<br>control training                             |                                                                                                                                                                                             |                                                                                                                                                                                                |                                                            |
|------------------------------------------|-------------------|-------------------------------|-------------------------------------------------------|--------------------------------------------------------------------------|---------------------------------------------------------------------------------------------------------------------------------------------------------------------------------------------|------------------------------------------------------------------------------------------------------------------------------------------------------------------------------------------------|------------------------------------------------------------|
| Von<br>Gruenigen<br>et al. <sup>40</sup> | Healthy<br>eating | Social<br>cognitive<br>theory | Simultaneous                                          | <b>Dose:</b><br>16 group<br>sessions<br>(60 min/session)                 | Goal-setting<br>(outcome;<br>weight loss)                                                                                                                                                   | <b>Healthy Eating</b><br>F&V intake*<br>0.32 [-0.14, 0.78]                                                                                                                                     | <b>Healthy Eating</b><br>F&V intake*<br>0.19 [-0.27, 0.65] |
|                                          |                   |                               |                                                       | 3 physician<br>counseling<br>sessions                                    | Goal-setting<br>(HE + PA)                                                                                                                                                                   | Total energy<br>intake*<br>-0.35 [-0.80, 0.14]                                                                                                                                                 | Total energy<br>intake*<br>-0.35 [-0.81, 0.11]             |
|                                          |                   |                               | Newsletters                                           | Action planning<br>(HE + PA)                                             | <b>Physical activity:</b><br>Total LTPA*<br>0.56 [0.10, 1.02]                                                                                                                               | <b>Physical activity:</b><br>Total LTPA*<br>0.36 [-0.19, 0.74]                                                                                                                                 |                                                            |
|                                          |                   |                               | Additional<br>contacts<br>(feedback and<br>support)   | Prompt self-<br>monitoring of<br>behavior<br>(HE + PA)                   | Steps taken <sup>c*</sup><br>0.58 [0.12, 1.04]                                                                                                                                              | Steps taken<br><i>Not assessed</i>                                                                                                                                                             |                                                            |
|                                          |                   |                               | <b>Materials:</b><br>Pedometer                        | Provide<br>feedback on<br>performance<br>(HE + PA)                       | *Significant when<br>difference in<br>means was<br>adjusted for age,<br>BMI, stage of<br>cancer, time since<br>diagnosis, adjuvant<br>treatment and<br>baseline behavior<br>( $p < 0.001$ ) | *Significant when<br>difference in<br>means was<br>adjusted for age,<br>BMI, stage of<br>cancer, time since<br>diagnosis,<br>adjuvant treatment<br>and baseline<br>behavior<br>( $p < 0.001$ ) |                                                            |
|                                          |                   |                               | Heart rate<br>monitor                                 | Model/<br>Demonstrate<br>the behavior<br>(HE + PA)                       |                                                                                                                                                                                             |                                                                                                                                                                                                |                                                            |
|                                          |                   |                               | 3-pound hand<br>and adjustable<br>weights             |                                                                          |                                                                                                                                                                                             |                                                                                                                                                                                                |                                                            |
|                                          |                   |                               | <b>Delivery:</b><br>In-person<br>Mail<br>Email; phone | Provide<br>instruction on<br>how to perform<br>the behavior<br>(HE + PA) |                                                                                                                                                                                             |                                                                                                                                                                                                |                                                            |

**Provider:**  
Physician,  
psychologist,  
dietician, and  
physical  
therapist

**Duration of the  
intervention:**  
6 months  
(26 weeks)

**Follow-up:**  
6 months  
(26 weeks)

---

*Note.* SMD: Standardized Mean Difference. F&V: Fruit and Vegetable. HE: Healthy Eating. PA: Physical Activity.

<sup>a</sup>Effect size calculated from *F*-test.

<sup>b</sup>Treatment effect was reported as a difference in proportion; Odds Ratio was computed and then converted into Standardized Mean Difference (Cohen's *d*).

<sup>c</sup>The average of standard deviations of the experimental and control groups were calculated from the 95% confidence interval for the difference in means.

<sup>d</sup>Mean and standard deviation were extracted from Figure of the original article.

<sup>e</sup>Results of zero-inflated negative binomial models (expressed as incidence rate ratio) were 1.3 [0.9, 1.9] at post-intervention) and 1.7 [1.2, 2.6] at follow-up.

<sup>f</sup>The standard deviation for the experimental and control group were calculated from the 95% confidence interval for the difference in means.

<sup>g</sup>Behavior change technique not listed the CALO-RE taxonomy.

### References

1. Andersen BL, Farrar WB, Golden-Kreutz DM, Glaser R, Emery CF, Crespin TR et al. Psychological, behavioral, and immune changes after a psychological intervention: a clinical trial. *J Clin Oncol*. 2004;22:3570-80. doi:10.1200/jco.2004.06.030.
2. Andersen BL, Farrar WB, Golden-Kreutz D, Emery CF, Glaser R, Crespin T, et al. Distress reduction from a psychological intervention contributes to improved health for cancer patients. *Brain Behav Immun*. 2007;21:953-61.
3. Andersen BL, Shelby RA, Golden-Kreutz DM. RCT of a Psychological Intervention for Patients With Cancer: I. Mechanisms of Change. *J Consult Clin Psychol*. 2007;75:927-38.
4. Anderson DJ, Seib C, McCarthy AL, Yates P, Porter-Steele J, McGuire A et al. Facilitating lifestyle changes to manage menopausal symptoms in women with breast cancer: a randomized controlled pilot trial of The Pink Women's Wellness Program. *Menopause*. 2015;22:937-45. doi:10.1097/gme.0000000000000421.
5. Bloom JR, Stewart SL, D'Onofrio CN, Luce J, Banks PJ. Addressing the needs of young breast cancer survivors at the 5 year milestone: can a short-term, low intensity intervention produce change? *J Cancer Surviv*. 2008;2:190-204. doi:10.1007/s11764-008-0058-x.
6. Bourke L, Doll H, Crank H, Daley A, Rosario D, Saxton JM. Lifestyle intervention in men with advanced prostate cancer receiving androgen suppression therapy: a feasibility study. *Cancer Epidemiol, Biomarkers Prev*. 2011;20:647-57. doi:10.1158/1055-9965.epi-10-1143.

7. Bourke L, Thompson G, Gibson DJ, Daley A, Crank H, Adam I et al. Pragmatic lifestyle intervention in patients recovering from colon cancer: a randomized controlled pilot study. *Arch Phys Med Rehab.* 2011;92:749-55. doi:10.1016/j.apmr.2010.12.020.
8. Bourke L, Gilbert S, Hooper R, Steed LA, Joshi M, Catto JWF et al. Lifestyle changes for improving disease-specific quality of life in sedentary men on long-term androgen-deprivation therapy for advanced prostate cancer: A randomised controlled trial. *Eur Urol* 2014;65:865-72. doi:http://dx.doi.org/10.1016/j.eururo.2013.09.040.
9. Campbell MK, Carr C, Devellis B, Switzer B, Biddle A, Amamoo MA et al. A randomized trial of tailoring and motivational interviewing to promote fruit and vegetable consumption for cancer prevention and control. *Ann Behav Med.* 2009;38:71-85. doi:10.1007/s12160-009-9140-5.
10. Demark-Wahnefried W, Clipp EC, Morey MC, Pieper CF, Sloane R, Snyder DC et al. Lifestyle intervention development study to improve physical function in older adults with cancer: Outcomes from project LEAD. *J Clin Oncol.* 2006;24:3465-73. doi:10.1200/JCO.2006.05.7224.
11. Demark-Wahnefried W, Morey MC, Clipp EC, Pieper CF, Snyder DC, Sloane R et al. Leading the Way in Exercise and Diet (Project LEAD): intervening to improve function among older breast and prostate cancer survivors. *Control Clin trials* 2003;24:206-23.
12. Demark-Wahnefried W., Clipp E. C., Lipkus I. M., Lobach D., Snyder D. C., Sloane R., et al. Main outcomes of the FRESH START trial: a sequentially tailored, diet and exercise mailed print intervention among breast and prostate cancer survivors. *Journal of clinical oncology*2007. p. 2709-18.

13. Christy S. M., Mosher C. E., Sloane R., Snyder D. C., Lobach D. F. and Demark-Wahnefried W. Long-term dietary outcomes of the FRESH START intervention for breast and prostate cancer survivors. *J Am Diet Assoc.* 2011;111:1844-51.
14. Mosher C. E., Lipkus I., Sloane R., Snyder D. C., Lobach D. F. and Demark-Wahnefried W. Long-term outcomes of the FRESH START trial: exploring the role of self-efficacy in cancer survivors' maintenance of dietary practices and physical activity. *Psychoncology* 2013. p. 876-85.
15. Ottenbacher A. J., Day R. S., Taylor W. C., Sharma S. V., Sloane R., Snyder D. C., et al. Long-term physical activity outcomes of home-based lifestyle interventions among breast and prostate cancer survivors. *Support Care Cancer.* 2012;20:2483-9.
16. Demark-Wahnefried W, Clipp EC, McBride C, Lobach DF, Lipkus I, Peterson B et al. Design of FRESH START: a randomized trial of exercise and diet among cancer survivors. *Med Sci Sports Exerc.* 2003;35:415-24.  
doi:10.1249/01.MSS.0000053704.28156.0F.
17. Demark-Wahnefried W. Print-to-Practice: Designing Tailored Print Materials to Improve Cancer Survivors' Dietary and Exercise Practices in the FRESH START Trial. *Nutr Today.* 2007;42:131-8. doi:10.1097/01.NT.0000277790.03666.95.
18. Demark-Wahnefried W, Case LD, Blackwell K, Marcom PK, Kraus W, Aziz N et al. Results of a diet/exercise feasibility trial to prevent adverse body composition change in breast cancer patients on adjuvant chemotherapy. *Clin Breast Cancer.* 2008;8:70-9.  
doi:10.3816/CBC.2008.n.005.
19. Demark-Wahnefried W, Jones LW, Snyder DC, Sloane RJ, Kimmick GG, Hughes DC et al. Daughters and Mothers Against Breast Cancer (DAMES): Main outcomes of a

- randomized controlled trial of weight loss in overweight mothers with breast cancer and their overweight daughters. *Cancer*. 2014;15:2522-34. doi:10.1002/cncr.28761.
20. Djuric Z, DiLaura NM, Jenkins I, Darga L, Jen CK, Mood D et al. Combining weight-loss counseling with the weight watchers plan for obese breast cancer survivors. *Obes Res*. 2002;10:657-65. doi:10.1038/oby.2002.89.
  21. Djuric Z, Ellsworth JS, Weldon AL, Ren J, Richardson CR, Resnicow K et al. A diet and exercise intervention during Chemotherapy for breast cancer. *Open Obes J*. 2011;3:87-97. doi:10.2174/1876823701103010087.
  22. Goodwin PJ, Segal RJ, Vallis M, Ligibel JA, Pond GR, Robidoux A et al. Randomized Trial of a Telephone-Based Weight Loss Intervention in Postmenopausal Women With Breast Cancer Receiving Letrozole: The LISA Trial. *J Clin Oncol*. 2014;32:2231-9. doi:10.1200/jco.2013.53.1517.
  23. Greenlee HA, Crew KD, Mata JM, McKinley PS, Rundle AG, Zhang W et al. A pilot randomized controlled trial of a commercial diet and exercise weight loss program in minority breast cancer survivors. *Obesity*. 2013;21:65-76. doi:10.1002/oby.20245.
  24. Hawkes AL, Chambers SK, Pakenham KI, Patrao TA, Baade PD, Lynch BM et al. Effects of a telephone-delivered multiple health behavior change intervention (CanChange) on health and behavioral outcomes in survivors of colorectal cancer: a randomized controlled trial. *J Clin Oncol*. 2013;31:2313-21. doi:10.1200/jco.2012.45.5873.
  25. Hawkes AL, Pakenham KI, Courneya KS, Gollschewski S, Baade P, Gordon LG et al. A randomised controlled trial of a tele-based lifestyle intervention for colorectal cancer



- survivors ('CanChange'): study protocol. *BMC Cancer*. 2009;9:286. doi:10.1186/1471-2407-9-286.
26. Hébert JR, Hurley TG, Harmon BE, Heiney S, Hebert CJ, Steck SE. A diet, physical activity, and stress reduction intervention in men with rising prostate-specific antigen after treatment for prostate cancer. *Cancer Epidemiol*. 2012;36:e128-36. doi:10.1016/j.canep.2011.09.008.
  27. Hung YC, Bauer JD, Horsely P, Coll J, Bashford J, Isenring EA. Telephone-delivered nutrition and exercise counselling after auto-SCT: A pilot, randomised controlled trial. *Bone Marrow Transplant*. 2014;49:786-92. doi:http://dx.doi.org/10.1038/bmt.2014.52.
  28. James EL, Stacey FG, Chapman K, Boyes AW, Burrows T, Girgis A et al. Impact of a nutrition and physical activity intervention (ENRICH: Exercise and Nutrition Routine Improving Cancer Health) on health behaviors of cancer survivors and carers: a pragmatic randomized controlled trial. *BMC Cancer*. 2015;15:710. doi:10.1186/s12885-015-1775-y.
  29. James EL, Stacey F, Chapman K, Lubans DR, Asprey G, Sundquist K et al. Exercise and nutrition routine improving cancer health (ENRICH): the protocol for a randomized efficacy trial of a nutrition and physical activity program for adult cancer survivors and carers. *BMC Public Health*. 2011;11:236. doi:10.1186/1471-2458-11-236.
  30. Kim SH, Shin MS, Lee HS, Lee ES, Ro JS, Kang HS et al. Randomized pilot test of a simultaneous stage-matched exercise and diet intervention for breast cancer survivors. *Oncol Nurs Forum*. 2011;38:E97-106. doi:10.1188/11.ONF.E97-E106.

31. Lee MK, Yun YH, Park HA, Lee ES, Jung KH, Noh DY. A Web-based self-management exercise and diet intervention for breast cancer survivors: Pilot randomized controlled trial. *Int J Nurs Stud*. 2014;51:1557-67. doi:10.1016/j.ijnurstu.2014.04.012.
32. Morey MC, Snyder DC, Sloane R, Cohen HJ, Peterson B, Hartman TJ et al. Effects of home-based diet and exercise on functional outcomes among older, overweight long-term cancer survivors: RENEW: a randomized controlled trial. *JAMA*. 2009;302:1883-91. doi:10.1001/jama.2009.643.
33. Demark-Wahnefried W, Morey MC, Sloane R, Snyder DC, Miller PE, Hartman TJ et al. Reach out to enhance wellness home-based diet-exercise intervention promotes reproducible and sustainable long-term improvements in health behaviors, body weight, and physical functioning in older, overweight/obese cancer survivors. *J Clin Oncol*. 2012;30:2354-61. doi:10.1200/JCO.2011.40.0895.
34. Snyder DC, Morey MC, Sloane R, Stull V, Cohen HJ, Peterson B et al. Reach out to ENhance Wellness in Older Cancer Survivors (RENEW): design, methods and recruitment challenges of a home-based exercise and diet intervention to improve physical function among long-term survivors of breast, prostate, and colorectal cancer. *Psycho-Oncology*. 2009;18:429-39. doi:10.1002/pon.1491.
35. Moyer-Mileur LJ, Ransdell L, Bruggers CS. Fitness of children with standard-risk acute lymphoblastic leukemia during maintenance therapy: response to a home-based exercise and nutrition program. *J Pediatr Hematol Oncol*. 2009;31:259-66. doi:10.1097/MPH.0b013e3181978fd4.
36. O'Carroll Bantum E, Albright CL, White KK, Berenberg JL, Layi G, Ritter PL et al. Surviving and thriving with cancer using a Web-based health behavior change

- intervention: randomized controlled trial. *J Med Internet Res.* 2014;16:e54.  
doi:10.2196/jmir.3020.
37. Ornish D, Weidner G, Fair WR, Marlin R, Pettengill EB, Raisin CJ et al. Intensive lifestyle changes may affect the progression of prostate cancer. *J Urol.* 2005;174:1065-9.  
doi:10.1097/01.ju.0000169487.49018.73.
38. Ornish DM, Lee KL, Fair WR, Pettengill EB, Carroll PR. Dietary trial in prostate cancer: Early experience and implications for clinical trial design. *Urol.* 2001;57(4 Suppl 1):200-1.
39. von Gruenigen VE, Courneya KS, Gibbons HE, Kavanagh MB, Waggoner SE, Lerner E. Feasibility and effectiveness of a lifestyle intervention program in obese endometrial cancer patients: a randomized trial. *Gynecol Oncol.* 2008;109:19-26.  
doi:10.1016/j.ygyno.2007.12.026.
40. von Gruenigen V, Frasure H, Kavanagh MB, Janata J, Waggoner S, Rose P et al. Survivors of uterine cancer empowered by exercise and healthy diet (SUCCEED): a randomized controlled trial. *Gynecol Oncol.* 2012;125:699-704.  
doi:10.1016/j.ygyno.2012.03.042.

**Supplementary File 4.** Matrix of Intervention Characteristics

Table 1. Matrix of Intervention Characteristics

| Providers                                                               | Mean               |                      |                             | Frequency                    |                                  |                                      |
|-------------------------------------------------------------------------|--------------------|----------------------|-----------------------------|------------------------------|----------------------------------|--------------------------------------|
|                                                                         | Median (Q1-Q3)     |                      |                             | (%)                          |                                  |                                      |
|                                                                         | Length<br>(weeks)  | Contacts<br>(number) | Intensity<br>(contact/week) | Tailored and<br>Theory-based | Non tailored and<br>Theory-based | Non tailored and<br>non-theory based |
| Exercise<br>specialist-led<br>( <i>k</i> = 4)                           | 16<br>13 (13 – 20) | 21<br>24 (18 – 24)   | 1.50<br>1.8 (1.2 – 1.8)     | 0<br>(0%)                    | 0<br>(0%)                        | 4<br>(15.4%)                         |
| Dietician-led<br>( <i>k</i> = 4)                                        | 46<br>52 (39 – 52) | 46<br>46 (12 – 81)   | 1.31<br>0.9 (0.2 – 2.4)     | 0<br>(0%)                    | 2<br>(7.7%)                      | 2<br>(7.7%)                          |
| Nurse or<br>Multidisciplinary<br>team-led ( <i>k</i> = 14) <sup>a</sup> | 31<br>26 (13 – 52) | 15<br>13 (11 – 19)   | 0.63<br>0.64 (0.36 – 0.92)  | 6<br>(23.1%)                 | 5 <sup>b</sup><br>(19.0%)        | 3<br>(11.5%)                         |
| Web/computer<br>assisted ( <i>k</i> = 4)                                | 29<br>28 (10 – 48) | 18<br>19 (12 – 25)   | 0.85<br>0.7 (0.2 – 1.5)     | 3<br>(11.5%)                 | 0<br>(0%)                        | 1 <sup>b</sup><br>(3.8%)             |

<sup>a</sup>Five MHBC interventions were delivered by a multidisciplinary team that include both exercise specialist and a dietitian. <sup>b</sup>Reported only long-term MHBC intervention effects. *k* = 26 due to one missing data for intervention provider.

Supplementary File 5. Publication Bias Assessment

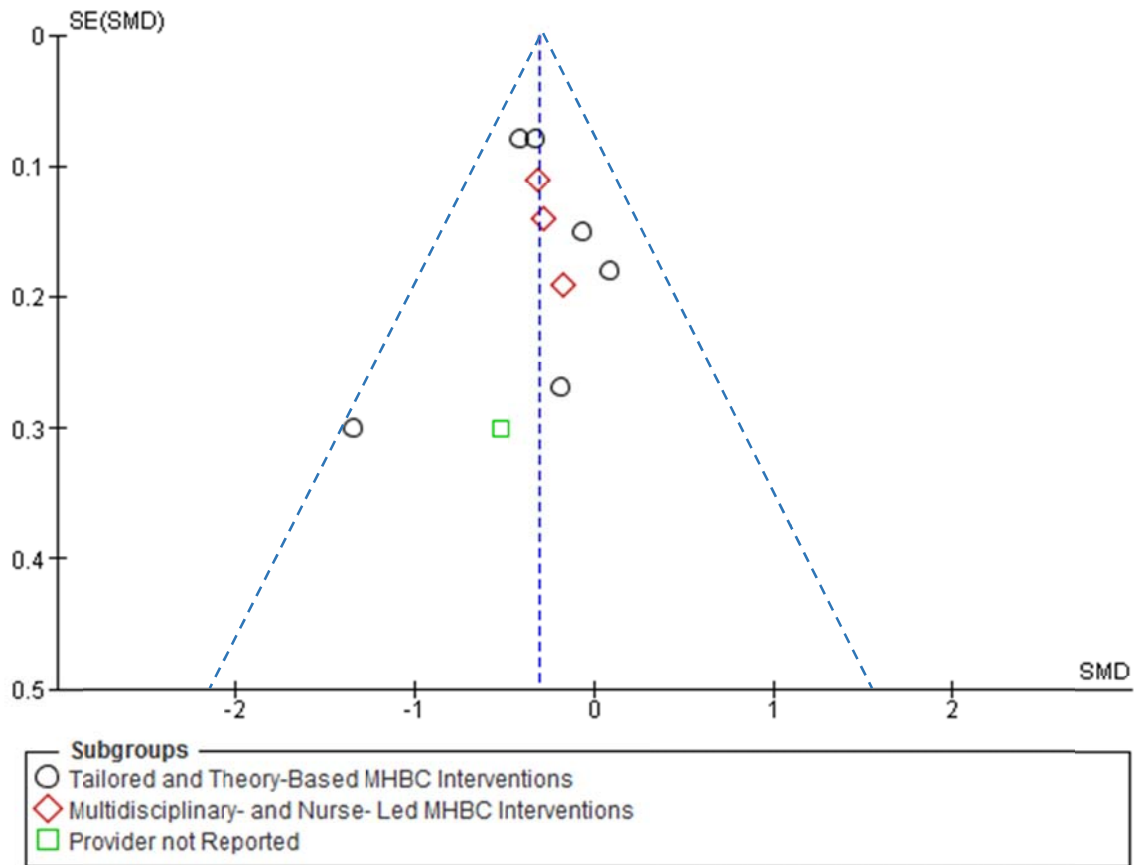

Figure 1. Funnel Plot for Fat Intake ( $k = 10$ ).

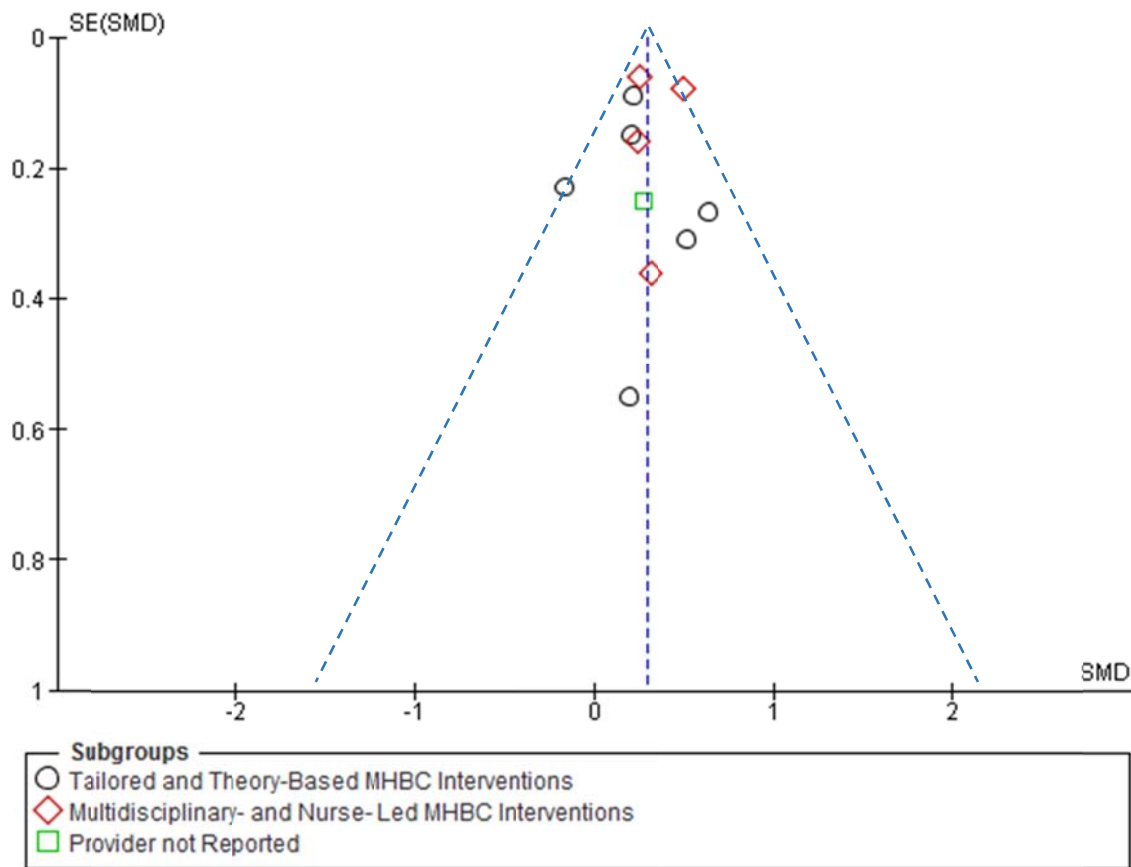

**Figure 2.** Funnel Plot for Fruit and Vegetable Intake ( $k = 11$ ).

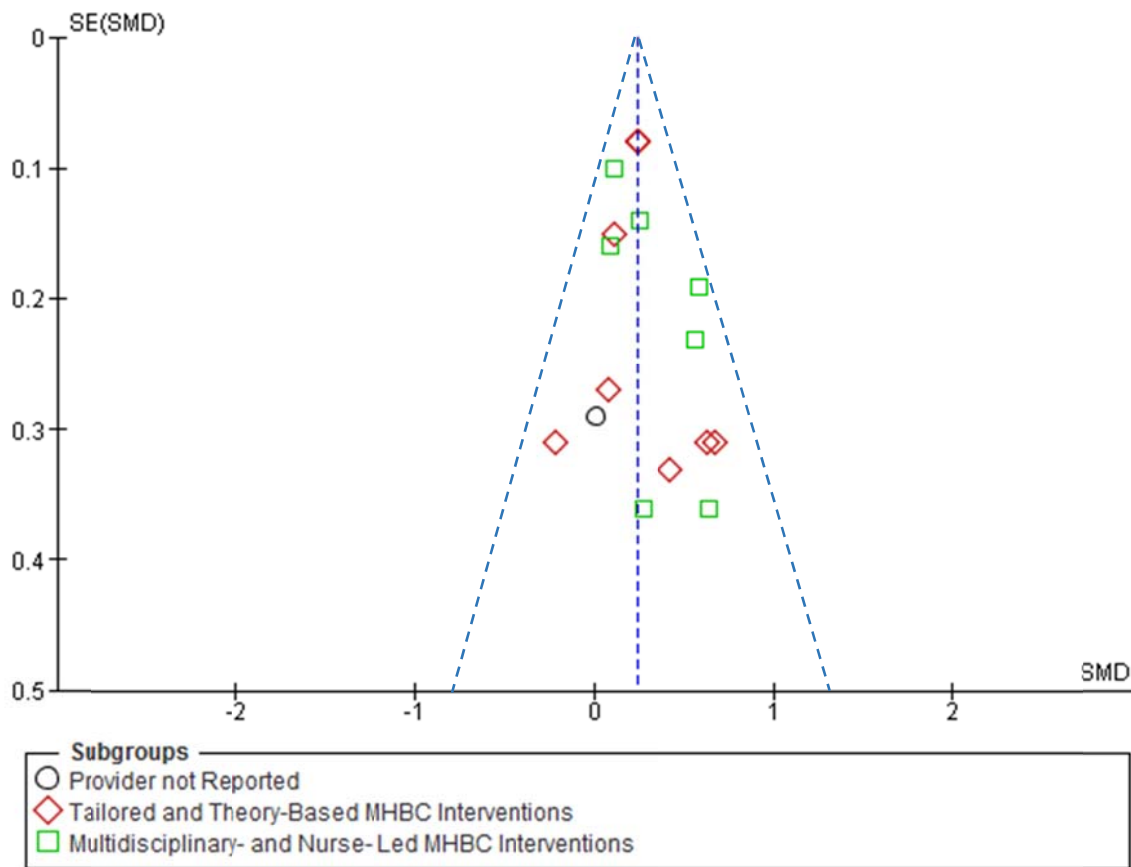

**Figure 3.** Funnel Plot for Physical Activity ( $k = 16$ ).

**Supplementary File 6.** Distribution of Behavioral Effect Sizes According to Risk of Bias

Table 1. Distribution of Physical Activity Effect Sizes According to Risk of Bias

|                              | Median | Q1   | Q3   | Minimum | Maximum |
|------------------------------|--------|------|------|---------|---------|
| Overall ( $k = 22$ )         | 0.54   | 0.24 | 0.64 | -0.16   | 1.72    |
| <i>Risk of bias:</i>         |        |      |      |         |         |
| Random sequence generation   |        |      |      |         |         |
| Low ( $k = 12$ )             | 0.47   | 0.18 | 0.73 | -0.22   | 1.22    |
| High ( $k = 1$ )             | 0.64   | -    | -    | -       | -       |
| Unclear ( $k = 9$ )          | 0.42   | 0.11 | 0.56 | -0.16   | 1.72    |
| Allocation concealment       |        |      |      |         |         |
| Low ( $k = 12$ )             | 0.48   | 0.18 | 0.73 | -0.22   | 1.22    |
| High ( $k = 10$ )            | 0.45   | 0.09 | 0.63 | -0.16   | 1.72    |
| Blinding of outcome assessor |        |      |      |         |         |
| Low ( $k = 5$ )              | 0.64   | 0.24 | 0.78 | 0.11    | 0.85    |
| High ( $k = 17$ )            | 0.42   | 0.11 | 0.63 | -0.22   | 1.72    |
| Incomplete outcome data      |        |      |      |         |         |
| Low ( $k = 4$ )              | 0.74   | 0.60 | 1.01 | 0.56    | 1.22    |
| High ( $k = 18$ )            | 0.30   | 0.11 | 0.64 | -0.22   | 1.72    |



Table 2. Distribution of Fruit and Vegetable Effect Sizes According to Risk of Bias

|                              | Median | Q1   | Q3   | Minimum | Maximum |
|------------------------------|--------|------|------|---------|---------|
| Overall ( $k = 13$ )         | 0.25   | 0.21 | 0.50 | -0.16   | 1.66    |
| <i>Risk of bias:</i>         |        |      |      |         |         |
| Random sequence generation   |        |      |      |         |         |
| Low ( $k = 6$ )              | 0.25   | 0.22 | 0.50 | -0.16   | 0.52    |
| High ( $k = 0$ )             | -      | -    | -    | -       | -       |
| Unclear ( $k = 7$ )          | 0.27   | 0.20 | 0.64 | 0.14    | 1.66    |
| Allocation concealment       |        |      |      |         |         |
| Low ( $k = 8$ )              | 0.24   | 0.21 | 0.51 | -0.16   | 1.66    |
| High ( $k = 5$ )             | 0.27   | 0.24 | 0.32 | 0.14    | 0.64    |
| Blinding of outcome assessor |        |      |      |         |         |
| Low ( $k = 3$ )              | 0.25   | 0.20 | 0.50 | 0.20    | 0.50    |
| High ( $k = 10$ )            | 0.26   | 0.21 | 0.52 | -0.16   | 1.66    |
| Incomplete outcome data      |        |      |      |         |         |
| Low ( $k = 1$ )              | 0.32   | -    | -    | -       | -       |
| High ( $k = 12$ )            | 0.25   | 0.21 | 0.51 | -0.16   | 1.66    |

Table 3. Distribution of Fat Intake Effect Sizes According to Risk of Bias

|                              | Median | Q1    | Q3    | Minimum | Maximum |
|------------------------------|--------|-------|-------|---------|---------|
| Overall ( $k = 17$ )         | -0.34  | -0.73 | -0.07 | -2.29   | 0.28    |
| <i>Risk of bias:</i>         |        |       |       |         |         |
| Random sequence generation   |        |       |       |         |         |
| Low ( $k = 9$ )              | -0.33  | -0.43 | -0.17 | -1.00   | 0.18    |
| High ( $k = 2$ )             | -1.32  | -     | -     | -2.29   | -0.34   |
| Unclear ( $k = 6$ )          | -0.30  | -0.73 | 0.16  | -1.35   | 0.28    |
| Allocation concealment       |        |       |       |         |         |
| Low ( $k = 11$ )             | -0.34  | -0.73 | -0.07 | -1.00   | 0.18    |
| High ( $k = 6$ )             | -0.35  | -1.35 | 0.16  | -2.29   | 0.28    |
| Blinding of outcome assessor |        |       |       |         |         |
| Low ( $k = 5$ )              | -0.34  | -0.43 | -0.33 | -0.93   | -0.31   |
| High ( $k = 12$ )            | -0.29  | -0.87 | 0.13  | -2.29   | 0.28    |
| Incomplete outcome data      |        |       |       |         |         |
| Low ( $k = 2$ )              | -0.72  | -     | -     | -1.00   | -0.43   |
| High ( $k = 15$ )            | -0.33  | -0.73 | 0.09  | -2.29   | 0.28    |

Table 4. Distribution of Total Energy Intake Effect Sizes According to Risk of Bias

|                                   | Median | Q1    | Q3    | Minimum | Maximum |
|-----------------------------------|--------|-------|-------|---------|---------|
| Overall ( $k = 13$ )              | -0.15  | -0.30 | -0.08 | -1.58   | 0.04    |
| <i>Risk of bias:</i>              |        |       |       |         |         |
| Random sequence generation        |        |       |       |         |         |
| Low ( $k = 6$ )                   | -0.14  | -0.22 | -0.08 | -0.66   | 0.04    |
| High ( $k = 1$ )                  | -1.58  | -     | -     | -       | -       |
| Unclear ( $k = 6$ )               | -0.16  | -0.30 | -0.07 | -0.35   | 0.04    |
| Allocation concealment            |        |       |       |         |         |
| Low ( $k = 5$ )                   | -0.12  | -0.22 | -0.07 | -0.66   | 0.04    |
| High ( $k = 8$ )                  | -0.18  | -0.33 | -0.10 | -1.58   | 0.04    |
| Blinding of outcome assessor      |        |       |       |         |         |
| Low ( $k = 2$ )                   | -0.17  | -     | -     | -0.22   | -0.12   |
| High ( $k = 11$ )                 | -0.15  | -0.35 | -0.07 | -1.58   | 0.04    |
| Incomplete outcome data addressed |        |       |       |         |         |
| Low ( $k = 3$ )                   | -0.35  | -0.66 | -0.22 | -0.66   | -0.22   |
| High ( $k = 10$ )                 | -0.12  | -0.20 | -0.07 | -1.58   | 0.04    |

**Supplementary File 7. The PRISMA Checklist**

| Section/topic             | # | Checklist item                                                                                                                                                                                                                                                                                              | Reported on page #         |
|---------------------------|---|-------------------------------------------------------------------------------------------------------------------------------------------------------------------------------------------------------------------------------------------------------------------------------------------------------------|----------------------------|
| <b>TITLE</b>              |   |                                                                                                                                                                                                                                                                                                             |                            |
| Title                     | 1 | Identify the report as a systematic review, meta-analysis, or both.                                                                                                                                                                                                                                         | 1                          |
| <b>ABSTRACT</b>           |   |                                                                                                                                                                                                                                                                                                             |                            |
| Structured summary        | 2 | Provide a structured summary including, as applicable: background; objectives; data sources; study eligibility criteria, participants, and interventions; study appraisal and synthesis methods; results; limitations; conclusions and implications of key findings; systematic review registration number. | 1-2                        |
| <b>INTRODUCTION</b>       |   |                                                                                                                                                                                                                                                                                                             |                            |
| Rationale                 | 3 | Describe the rationale for the review in the context of what is already known.                                                                                                                                                                                                                              | 2-3                        |
| Objectives                | 4 | Provide an explicit statement of questions being addressed with reference to participants, interventions, comparisons, outcomes, and study design (PICOS).                                                                                                                                                  | 3                          |
| <b>METHODS</b>            |   |                                                                                                                                                                                                                                                                                                             |                            |
| Protocol and registration | 5 | Indicate if a review protocol exists, if and where it can be accessed (e.g., Web address), and, if available, provide registration information including registration number.                                                                                                                               | N/A                        |
| Eligibility criteria      | 6 | Specify study characteristics (e.g., PICOS, length of follow-up) and report characteristics (e.g., years considered, language, publication status) used as criteria for eligibility, giving rationale.                                                                                                      | 3                          |
| Information sources       | 7 | Describe all information sources (e.g., databases with dates of coverage, contact with study authors to identify additional studies) in the search and date last searched.                                                                                                                                  | 3 and Supplementary File 1 |
| Search                    | 8 | Present full electronic search strategy for at least one database, including any limits used, such that it could be repeated.                                                                                                                                                                               | 3 and Supplementary File 1 |
| Study selection           | 9 | State the process for selecting studies (i.e., screening, eligibility, included in systematic review, and, if applicable, included in the meta-analysis).                                                                                                                                                   | 3                          |

|                                    |    |                                                                                                                                                                                                                        |                                  |
|------------------------------------|----|------------------------------------------------------------------------------------------------------------------------------------------------------------------------------------------------------------------------|----------------------------------|
| Data collection process            | 10 | Describe method of data extraction from reports (e.g., piloted forms, independently, in duplicate) and any processes for obtaining and confirming data from investigators.                                             | 3-4                              |
| Data items                         | 11 | List and define all variables for which data were sought (e.g., PICOS, funding sources) and any assumptions and simplifications made.                                                                                  | 3-4                              |
| Risk of bias in individual studies | 12 | Describe methods used for assessing risk of bias of individual studies (including specification of whether this was done at the study or outcome level), and how this information is to be used in any data synthesis. | 4                                |
| Summary measures                   | 13 | State the principal summary measures (e.g., risk ratio, difference in means).                                                                                                                                          | 4 and<br>Supplementary<br>File 2 |
| Synthesis of results               | 14 | Describe the methods of handling data and combining results of studies, if done, including measures of consistency (e.g., $I^2$ for each meta-analysis).                                                               | 4                                |

| Section/topic               | #  | Checklist item                                                                                                                                                  | Reported on page #                                      |
|-----------------------------|----|-----------------------------------------------------------------------------------------------------------------------------------------------------------------|---------------------------------------------------------|
| Risk of bias across studies | 15 | Specify any assessment of risk of bias that may affect the cumulative evidence (e.g., publication bias, selective reporting within studies).                    | 4                                                       |
| Additional analyses         | 16 | Describe methods of additional analyses (e.g., sensitivity or subgroup analyses, meta-regression), if done, indicating which were pre-specified.                | 5-7;10                                                  |
| <b>RESULTS</b>              |    |                                                                                                                                                                 |                                                         |
| Study selection             | 17 | Give numbers of studies screened, assessed for eligibility, and included in the review, with reasons for exclusions at each stage, ideally with a flow diagram. | 5                                                       |
| Study characteristics       | 18 | For each study, present characteristics for which data were extracted (e.g., study size, PICOS, follow-up period) and provide the citations.                    | 5-6 and<br>Supplementary<br>File 3                      |
| Risk of bias within studies | 19 | Present data on risk of bias of each study and, if available, any outcome level assessment (see item 12).                                                       | 6, Table 1,<br>Figure 2, and<br>Supplementary<br>File 4 |

|                               |    |                                                                                                                                                                                                          |                                               |
|-------------------------------|----|----------------------------------------------------------------------------------------------------------------------------------------------------------------------------------------------------------|-----------------------------------------------|
| Results of individual studies | 20 | For all outcomes considered (benefits or harms), present, for each study: (a) simple summary data for each intervention group (b) effect estimates and confidence intervals, ideally with a forest plot. | 6-10, Table 2, Supplementary File 3 (Table 2) |
| Synthesis of results          | 21 | Present results of each meta-analysis done, including confidence intervals and measures of consistency.                                                                                                  | 9, Table 2                                    |
| Risk of bias across studies   | 22 | Present results of any assessment of risk of bias across studies (see Item 15).                                                                                                                          | 10;<br>Supplementary File 5                   |
| Additional analysis           | 23 | Give results of additional analyses, if done (e.g., sensitivity or subgroup analyses, meta-regression [see Item 16]).                                                                                    | 10, Table 2                                   |
| <b>DISCUSSION</b>             |    |                                                                                                                                                                                                          |                                               |
| Summary of evidence           | 24 | Summarize the main findings including the strength of evidence for each main outcome; consider their relevance to key groups (e.g., healthcare providers, users, and policy makers).                     | 10-12                                         |
| Limitations                   | 25 | Discuss limitations at study and outcome level (e.g., risk of bias), and at review-level (e.g., incomplete retrieval of identified research, reporting bias).                                            | 10-12                                         |
| Conclusions                   | 26 | Provide a general interpretation of the results in the context of other evidence, and implications for future research.                                                                                  | 12-13                                         |
| <b>FUNDING</b>                |    |                                                                                                                                                                                                          |                                               |
| Funding                       | 27 | Describe sources of funding for the systematic review and other support (e.g., supply of data); role of funders for the systematic review.                                                               | 13                                            |

From: Moher D, Liberati A, Tetzlaff J, Altman DG, The PRISMA Group (2009). Preferred Reporting Items for Systematic Reviews and Meta-Analyses: The PRISMA Statement. PLoS Med 6(7): e1000097. doi:10.1371/journal.pmed1000097

For more information, visit: [www.prisma-statement.org](http://www.prisma-statement.org).
